# Supplementary material for: Transcriptional heterogeneity of ventricular zone cells in the ganglionic eminences of the mouse forebrain
Source: eLife. 2022 Feb 17;11:e71864. doi: 10.7554/eLife.71864 (PMC8887903; doi:10.7554/eLife.71864)
Supplement: Supplementary file 1. — Table contains the genes that are enriched in the Nestin-positive VZ cells (1,083 genes), mitotic Dcx-positive SVZ cells (330 genes) and postmitotic Dcx-positive SVZ/MZ cells (1,320 genes), all with a minimum log-fold change = 0.25. [file elife-71864-supp1.xlsx]

## Sheet: Sheet1
gene	p_val	avg_log2FC	pct.1	pct.2	p_val_adj	cluster
Fabp7	0	2.99786	0.855	0.408	0	VZ
Hes5	0	2.3989	0.765	0.161	0	VZ
Nes	0	2.35192	1	0.296	0	VZ
Ptn	0	2.05879	0.64	0.138	0	VZ
Ccnd1	0	2.02635	0.839	0.193	0	VZ
Ptprz1	0	1.89518	0.871	0.383	0	VZ
Ddah1	0	1.64953	0.849	0.325	0	VZ
Mt3	0	1.63555	0.581	0.159	0	VZ
Sfrp1	0	1.56045	0.785	0.358	0	VZ
Dbi	0	1.45993	0.962	0.745	0	VZ
Lhx2	0	1.45851	0.777	0.222	0	VZ
Vim	0	1.41906	0.961	0.711	0	VZ
Hmga2	0	1.39639	0.525	0.066	0	VZ
Rgcc	0	1.38851	0.486	0.048	0	VZ
Pea15a	0	1.38173	0.743	0.304	0	VZ
Ldha	0	1.37784	0.784	0.346	0	VZ
Ednrb	0	1.37684	0.587	0.057	0	VZ
Ttyh1	0	1.33892	0.558	0.101	0	VZ
Phgdh	0	1.24909	0.709	0.212	0	VZ
Nrarp	0	1.23368	0.588	0.129	0	VZ
Zfp36l1	0	1.23301	0.61	0.095	0	VZ
Selenoh	0	1.21635	0.628	0.253	0	VZ
Igfbp5	0	1.21365	0.342	0.03	0	VZ
Sparc	0	1.14977	0.445	0.026	0	VZ
Sox9	0	1.14029	0.788	0.407	0	VZ
Olig2	0	1.13111	0.558	0.137	0	VZ
Arhgap5	0	1.12907	0.795	0.395	0	VZ
Siva1	0	1.1245	0.872	0.486	0	VZ
Nr2e1	0	1.10741	0.617	0.178	0	VZ
Jun	0	1.09365	0.607	0.197	0	VZ
mt-Co2	0	1.07932	0.68	0.346	0	VZ
Pclaf	0	1.07761	0.525	0.156	0	VZ
Plpp3	0	1.0536	0.431	0.037	0	VZ
Rack1	0	1.05188	0.642	0.289	0	VZ
Selenof	0	1.04841	0.603	0.228	0	VZ
Slc1a3	0	1.04259	0.362	0.028	0	VZ
mt-Co3	0	1.03257	0.658	0.319	0	VZ
Notch1	0	1.02372	0.858	0.44	0	VZ
Psat1	0	0.997965	0.569	0.179	0	VZ
Slc25a5	0	0.990811	0.944	0.798	0	VZ
mt-Atp6	0	0.985605	0.821	0.598	0	VZ
Anp32b	0	0.983177	0.973	0.763	0	VZ
Gm47283	0	0.980916	0.569	0.218	0	VZ
Nap1l1	0	0.967976	0.949	0.776	0	VZ
Odc1	0	0.967604	0.928	0.661	0	VZ
Prdx1	0	0.963341	0.887	0.649	0	VZ
Dek	0	0.956983	0.941	0.669	0	VZ
Pdpn	0	0.956681	0.493	0.056	0	VZ
Usp1	0	0.954605	0.826	0.42	0	VZ
Atp5g2	0	0.953534	0.657	0.317	0	VZ
Fgfbp3	0	0.948105	0.399	0.095	0	VZ
Mcm3	0	0.944321	0.61	0.206	0	VZ
Id4	1.78261e-261	0.921263	0.548	0.311	4.19466e-257	VZ
Ildr2	0	0.917018	0.539	0.102	0	VZ
Pgk1	0	0.912629	0.597	0.261	0	VZ
Efhd2	0	0.90093	0.649	0.252	0	VZ
Eef1d	0	0.897729	0.822	0.555	0	VZ
Sall3	0	0.896932	0.489	0.091	0	VZ
Snu13	0	0.882184	0.598	0.242	0	VZ
Mif	0	0.87576	0.948	0.848	0	VZ
Lmo1	0	0.875493	0.803	0.418	0	VZ
CT025619.1	0	0.869812	0.476	0.124	0	VZ
Hells	0	0.869384	0.63	0.238	0	VZ
Ckb	0	0.864496	0.986	0.938	0	VZ
Nfia	0	0.861297	0.715	0.378	0	VZ
Pkdcc	0	0.860539	0.342	0.061	0	VZ
Nfix	0	0.857995	0.431	0.085	0	VZ
Myo10	0	0.850736	0.697	0.281	0	VZ
Gng5	0	0.842013	0.979	0.809	0	VZ
Btg2	0	0.835515	0.603	0.274	0	VZ
Tpi1	0	0.833052	0.718	0.383	0	VZ
Idi1	0	0.832294	0.6	0.248	0	VZ
Ncl	0	0.832106	0.961	0.89	0	VZ
Elob	0	0.825163	0.631	0.281	0	VZ
Fzd8	0	0.82065	0.423	0.07	0	VZ
Sox21	0	0.819776	0.574	0.182	0	VZ
Tuba1b	0	0.812717	0.96	0.802	0	VZ
Rpl27a	0	0.810587	0.958	0.909	0	VZ
Ephb1	0	0.810064	0.458	0.097	0	VZ
Ybx3	0	0.806443	0.692	0.34	0	VZ
Dut	0	0.803152	0.877	0.592	0	VZ
Gli3	0	0.799659	0.487	0.137	0	VZ
Rpl12	0	0.79885	0.993	0.965	0	VZ
Hspd1	0	0.798757	0.89	0.736	0	VZ
Qk	0	0.796013	0.955	0.813	0	VZ
Dctpp1	0	0.795472	0.811	0.498	0	VZ
Hist1h1b	1.916e-187	0.790901	0.453	0.252	4.50853e-183	VZ
Nasp	0	0.790562	0.949	0.804	0	VZ
Fgfr3	0	0.790163	0.336	0.041	0	VZ
Hnrnpu	0	0.789996	0.956	0.852	0	VZ
Rpl15	0	0.789514	0.944	0.911	0	VZ
Hnrnpf	0	0.786139	0.951	0.825	0	VZ
Oat	0	0.774471	0.531	0.167	0	VZ
Rps2	0	0.763878	0.997	0.992	0	VZ
Prdx4	0	0.761185	0.603	0.241	0	VZ
Lix1	0	0.760806	0.438	0.166	0	VZ
Zbtb20	0	0.76051	0.95	0.811	0	VZ
Ppap2b	2.38221e-212	0.749165	0.239	0.076	5.60558e-208	VZ
Tipin	0	0.748018	0.813	0.463	0	VZ
Dhfr	0	0.741319	0.579	0.236	0	VZ
Nop58	0	0.737877	0.75	0.431	0	VZ
Slbp	0	0.733618	0.753	0.441	0	VZ
Dtl	0	0.731624	0.5	0.157	0	VZ
Ptx3	0	0.725885	0.257	0.022	0	VZ
Hspe1	0	0.724753	0.959	0.859	0	VZ
Cdk6	0	0.722346	0.422	0.099	0	VZ
Serpinh1	0	0.720218	0.481	0.14	0	VZ
Rpl5	0	0.717129	0.954	0.907	0	VZ
Zeb1	0	0.715871	0.613	0.265	0	VZ
Ptges3	0	0.713292	0.942	0.769	0	VZ
Npm1	0	0.712826	0.987	0.974	0	VZ
Rps6	0	0.712822	0.943	0.858	0	VZ
Nsd2	0	0.71254	0.568	0.23	0	VZ
Selenow	0	0.706716	0.624	0.278	0	VZ
Ran	0	0.70665	0.991	0.96	0	VZ
Hes1	0	0.705478	0.305	0.018	0	VZ
Rrm2	0	0.703546	0.819	0.458	0	VZ
Rpl24	0	0.702445	0.946	0.883	0	VZ
Naa50	0	0.701863	0.713	0.365	0	VZ
Cdv3	0	0.697609	0.91	0.696	0	VZ
Serbp1	0	0.694579	0.981	0.937	0	VZ
Lig1	0	0.689448	0.605	0.303	0	VZ
Mest	5.80805e-84	0.689129	0.57	0.445	1.36669e-79	VZ
Hmgn3	0	0.686621	0.772	0.458	0	VZ
Mcm7	0	0.686049	0.768	0.51	0	VZ
Uhrf1	0	0.685013	0.664	0.332	0	VZ
Mcm6	0	0.68197	0.604	0.275	0	VZ
Epb41	0	0.680523	0.411	0.094	0	VZ
Rbp1	2.48112e-135	0.675552	0.768	0.643	5.83833e-131	VZ
Peg12	0	0.674373	0.521	0.171	0	VZ
Kmt5a	0	0.669498	0.461	0.16	0	VZ
Mdk	0	0.668947	0.936	0.649	0	VZ
Pmm1	0	0.668768	0.485	0.174	0	VZ
H2afz	0	0.666843	0.999	0.989	0	VZ
Rplp1	0	0.665743	0.997	0.99	0	VZ
Gm42418	0	0.6638	0.596	0.267	0	VZ
Rpl22l1	0	0.658368	0.961	0.829	0	VZ
Gar1	0	0.657794	0.585	0.252	0	VZ
Atad2	0	0.657284	0.614	0.282	0	VZ
Rpa2	0	0.655664	0.555	0.236	0	VZ
Fgfr2	0	0.653371	0.389	0.104	0	VZ
Pcdh10	0	0.652308	0.478	0.152	0	VZ
Iqgap2	0	0.651729	0.393	0.063	0	VZ
Mcm4	0	0.64999	0.498	0.189	0	VZ
Creb5	0	0.64979	0.295	0.03	0	VZ
Ung	0	0.64879	0.362	0.099	0	VZ
Atp5l	0	0.643542	0.647	0.356	0	VZ
Eloc	0	0.642542	0.541	0.222	0	VZ
Sem1	0	0.642294	0.632	0.281	0	VZ
mt-Co1	0	0.64197	0.974	0.941	0	VZ
Gmnn	0	0.641519	0.659	0.323	0	VZ
Tcf7l2	0	0.640634	0.371	0.071	0	VZ
Gnl3	0	0.63665	0.538	0.227	0	VZ
Hpf1	0	0.635762	0.472	0.163	0	VZ
Acot1	0	0.635195	0.419	0.114	0	VZ
Canx	0	0.630038	0.801	0.553	0	VZ
Metrn	0	0.629557	0.441	0.125	0	VZ
Tacc1	0	0.628493	0.43	0.14	0	VZ
Hmgcs1	1.13033e-272	0.628296	0.766	0.554	2.65977e-268	VZ
Mcm5	0	0.627927	0.548	0.236	0	VZ
Gins2	0	0.62591	0.45	0.142	0	VZ
Lsm2	0	0.625341	0.848	0.593	0	VZ
Ipo5	0	0.624818	0.614	0.31	0	VZ
Tkt	0	0.624718	0.728	0.46	0	VZ
Tfdp1	0	0.623542	0.456	0.158	0	VZ
Pantr1	0	0.621096	0.967	0.844	0	VZ
Fam53b	0	0.620204	0.463	0.15	0	VZ
Nfib	0	0.617606	0.848	0.532	0	VZ
Dkc1	0	0.617088	0.608	0.286	0	VZ
Rif1	0	0.617035	0.727	0.424	0	VZ
Txn1	0	0.614483	0.926	0.773	0	VZ
Mrfap1	0	0.613246	0.968	0.882	0	VZ
Grb10	0	0.612315	0.783	0.463	0	VZ
Hmgb2	0	0.61181	0.973	0.73	0	VZ
Gcsh	0	0.611698	0.578	0.262	0	VZ
Pcna	0	0.611109	0.539	0.261	0	VZ
Ndufa12	9.52837e-297	0.610753	0.685	0.457	2.24212e-292	VZ
Plagl1	0	0.609395	0.311	0.048	0	VZ
Nop56	0	0.608791	0.786	0.516	0	VZ
Lyar	0	0.608687	0.727	0.433	0	VZ
Kif15	0	0.608599	0.54	0.24	0	VZ
Sfrp2	0	0.607559	0.353	0.069	0	VZ
Cdca8	0	0.606722	0.707	0.382	0	VZ
Rbbp7	0	0.605588	0.663	0.362	0	VZ
Hsp90b1	8.7549e-266	0.604044	0.867	0.724	2.06012e-261	VZ
Mki67	0	0.603371	0.716	0.371	0	VZ
Prdx6	0	0.600693	0.779	0.525	0	VZ
Rcn1	0	0.596409	0.383	0.092	0	VZ
Tubb4b	8.51719e-163	0.595555	0.652	0.482	2.00418e-158	VZ
Mir9-3hg	0	0.594557	0.481	0.194	0	VZ
Nek6	0	0.594418	0.367	0.073	0	VZ
Rps27l	0	0.592237	0.948	0.801	0	VZ
Kpnb1	0	0.592161	0.756	0.484	0	VZ
Pabpc1	0	0.590168	0.944	0.812	0	VZ
Eif2s2	0	0.589683	0.891	0.729	0	VZ
Mcm2	0	0.589658	0.586	0.279	0	VZ
Rpl17	0	0.587386	0.982	0.963	0	VZ
Ptch1	4.02777e-288	0.585073	0.428	0.177	9.47774e-284	VZ
Smo	0	0.584751	0.557	0.228	0	VZ
Sema6a	0	0.582633	0.412	0.127	0	VZ
Rfc1	0	0.57777	0.605	0.314	0	VZ
Mir99ahg	0.00124775	0.576116	0.296	0.324	1	VZ
Wnt7b	0	0.575448	0.22	0.026	0	VZ
Taf1d	0	0.57453	0.61	0.314	0	VZ
Cspg5	0	0.573642	0.377	0.121	0	VZ
E2f5	0	0.573269	0.427	0.14	0	VZ
Rps19	0	0.572228	0.993	0.981	0	VZ
Notch3	0	0.5712	0.3	0.032	0	VZ
Serf2	0	0.570953	0.928	0.787	0	VZ
Adgrl2	0	0.570629	0.33	0.072	0	VZ
Gpc1	8.43694e-279	0.570545	0.774	0.535	1.9853e-274	VZ
Cnbp	0	0.568227	0.932	0.783	0	VZ
Cpe	5.97567e-103	0.567831	0.667	0.529	1.40613e-98	VZ
Rplp0	0	0.565791	0.995	0.993	0	VZ
Topbp1	0	0.563128	0.661	0.344	0	VZ
Cdk2ap1	0	0.562222	0.938	0.714	0	VZ
Zfp36l2	0	0.561835	0.352	0.085	0	VZ
Gjc1	0	0.559447	0.646	0.345	0	VZ
Asrgl1	0	0.559446	0.389	0.126	0	VZ
Hadh	0	0.558729	0.346	0.055	0	VZ
Pon2	0	0.557153	0.34	0.069	0	VZ
Msmo1	6.33514e-237	0.556767	0.542	0.297	1.49072e-232	VZ
Paics	0	0.556281	0.789	0.532	0	VZ
Ntrk2	3.10987e-194	0.554188	0.335	0.143	7.31783e-190	VZ
Hmgb1	0	0.553223	0.989	0.963	0	VZ
Hsp90aa1	0	0.553019	0.977	0.962	0	VZ
G3bp1	0	0.552341	0.929	0.796	0	VZ
Skp2	0	0.551993	0.591	0.287	0	VZ
Bex3	1.30716e-301	0.551488	0.583	0.265	3.07587e-297	VZ
Set	0	0.549538	0.996	0.984	0	VZ
Pdia6	1.13586e-235	0.548567	0.748	0.56	2.67279e-231	VZ
Rpl14	0	0.547463	0.992	0.975	0	VZ
Nde1	0	0.546708	0.528	0.238	0	VZ
Ntn1	0	0.546636	0.271	0.032	0	VZ
Lxn	0	0.545753	0.284	0.058	0	VZ
Glo1	0	0.545388	0.6	0.307	0	VZ
Hirip3	4.55415e-300	0.545072	0.665	0.374	1.07164e-295	VZ
Rpl23a	0	0.544088	0.93	0.867	0	VZ
Impdh2	1.43416e-302	0.543645	0.557	0.288	3.37473e-298	VZ
mt-Nd3	1.57107e-280	0.542478	0.802	0.545	3.69689e-276	VZ
Clspn	1.62051e-290	0.542342	0.525	0.245	3.81323e-286	VZ
Rest	0	0.541811	0.312	0.043	0	VZ
Plce1	0	0.541575	0.259	0.018	0	VZ
Cenpf	2.32103e-287	0.541056	0.698	0.371	5.46162e-283	VZ
Nhp2	2.34699e-298	0.540777	0.699	0.435	5.52271e-294	VZ
Aldoa	1.09185e-205	0.539053	0.64	0.428	2.56923e-201	VZ
Itgb8	0	0.538329	0.456	0.172	0	VZ
Hat1	1.8519e-292	0.538095	0.704	0.426	4.35771e-288	VZ
Pgam1	3.1649e-305	0.534797	0.876	0.74	7.44733e-301	VZ
Adk	0	0.534074	0.382	0.106	0	VZ
Sec61g	3.41373e-267	0.534044	0.712	0.476	8.03285e-263	VZ
Dlk1	7.12108e-213	0.532202	0.328	0.125	1.67566e-208	VZ
Acss1	0	0.532124	0.389	0.119	0	VZ
Ccna2	5.41418e-283	0.531844	0.648	0.34	1.27401e-278	VZ
Scaf11	2.21644e-303	0.531691	0.764	0.513	5.21551e-299	VZ
Ranbp1	0	0.531345	0.98	0.907	0	VZ
Hip1	0	0.530717	0.455	0.161	0	VZ
Itga6	0	0.528788	0.325	0.079	0	VZ
Rpl18	0	0.526791	0.987	0.976	0	VZ
Trir	3.25527e-288	0.526455	0.548	0.249	7.65998e-284	VZ
Pimreg	6.95816e-273	0.526033	0.295	0.083	1.63732e-268	VZ
Tgif2	0	0.525541	0.476	0.19	0	VZ
Dnajc9	0	0.524951	0.812	0.568	0	VZ
Timm8a1	0	0.524208	0.338	0.067	0	VZ
Cyr61	0	0.524185	0.246	0.023	0	VZ
Mrpl58	0	0.524147	0.432	0.161	0	VZ
Cdca3	4.24567e-258	0.523316	0.65	0.358	9.99048e-254	VZ
Mfge8	0	0.522981	0.241	0.037	0	VZ
Mycn	3.95094e-269	0.521894	0.417	0.174	9.29695e-265	VZ
Wwc1	0	0.521205	0.275	0.043	0	VZ
Stk39	1.0064e-295	0.520815	0.396	0.146	2.36816e-291	VZ
Magt1	0	0.520632	0.396	0.141	0	VZ
Slc35f1	2.70859e-289	0.520059	0.42	0.167	6.37359e-285	VZ
Mpp6	1.67045e-287	0.519677	0.714	0.46	3.93074e-283	VZ
Wapl	0	0.517394	0.461	0.184	0	VZ
Pa2g4	6.54855e-277	0.516018	0.74	0.514	1.54094e-272	VZ
Nsmce4a	2.92604e-289	0.515977	0.761	0.522	6.88527e-285	VZ
Rpl13	0	0.51579	0.998	0.995	0	VZ
Knl1	4.15803e-289	0.515384	0.311	0.086	9.78425e-285	VZ
Dtymk	1.20269e-286	0.515207	0.741	0.482	2.83004e-282	VZ
Snx5	0	0.513647	0.471	0.197	0	VZ
Rps10	0	0.513303	0.988	0.981	0	VZ
Nop10	1.77794e-279	0.511321	0.765	0.535	4.18366e-275	VZ
Msi2	3.70105e-266	0.505352	0.85	0.646	8.70893e-262	VZ
Rexo2	0	0.503741	0.437	0.166	0	VZ
Tyms	1.25485e-272	0.503738	0.617	0.342	2.95279e-268	VZ
Clic1	5.28634e-261	0.503473	0.673	0.411	1.24393e-256	VZ
Tk1	6.31376e-298	0.502737	0.406	0.153	1.48569e-293	VZ
Ift74	3.97002e-288	0.501571	0.541	0.265	9.34186e-284	VZ
Aprt	8.66418e-239	0.500559	0.535	0.293	2.03877e-234	VZ
Ptprf	3.4908e-255	0.49992	0.518	0.255	8.21421e-251	VZ
Fkbp3	0	0.499568	0.919	0.817	0	VZ
Vcam1	0	0.499418	0.229	0.016	0	VZ
1810037I17Rik	3.57726e-263	0.49931	0.798	0.575	8.41766e-259	VZ
Otx2	0	0.498161	0.235	0.017	0	VZ
Yap1	0	0.498079	0.285	0.029	0	VZ
Thap12	0	0.49636	0.387	0.129	0	VZ
Hspa9	5.80457e-264	0.493967	0.751	0.527	1.36587e-259	VZ
Gsx2	5.53653e-252	0.493787	0.416	0.175	1.3028e-247	VZ
Ptbp1	1.19608e-282	0.493494	0.59	0.309	2.8145e-278	VZ
Lap3	0	0.493035	0.371	0.103	0	VZ
2610001J05Rik	0	0.49235	0.455	0.179	0	VZ
Rpl41	0	0.4912	1	0.996	0	VZ
Hspa4	3.92776e-278	0.49085	0.808	0.604	9.24242e-274	VZ
Supt16	5.50775e-264	0.489974	0.832	0.643	1.29603e-259	VZ
Fam171b	9.96172e-214	0.48891	0.525	0.288	2.34409e-209	VZ
Lockd	0	0.488563	0.326	0.09	0	VZ
Srsf9	6.52079e-308	0.487526	0.888	0.714	1.53441e-303	VZ
Cenpm	5.16735e-302	0.487408	0.568	0.276	1.21593e-297	VZ
Jpt2	0	0.485746	0.318	0.072	0	VZ
Rad51	5.30241e-306	0.485538	0.394	0.141	1.24771e-301	VZ
Wwtr1	0	0.485446	0.285	0.037	0	VZ
Eif1ax	1.03469e-301	0.481973	0.884	0.709	2.43474e-297	VZ
Ctnna1	9.37565e-270	0.480495	0.577	0.303	2.20618e-265	VZ
Hist1h4i	1.18634e-264	0.479623	0.489	0.233	2.79157e-260	VZ
Fstl1	5.07536e-296	0.479199	0.334	0.102	1.19428e-291	VZ
Prdm16	0	0.47892	0.258	0.03	0	VZ
Flrt3	1.18258e-211	0.478861	0.395	0.18	2.78274e-207	VZ
Vamp3	3.16968e-285	0.478215	0.437	0.18	7.45859e-281	VZ
Cdc20	1.56752e-143	0.478049	0.417	0.235	3.68854e-139	VZ
H2-Ke6	0	0.47792	0.318	0.076	0	VZ
Syce2	7.07779e-286	0.47784	0.424	0.172	1.66547e-281	VZ
Dpy19l1	0	0.476139	0.323	0.079	0	VZ
Rorb	1.70601e-259	0.475919	0.299	0.092	4.01441e-255	VZ
Cenpx	0	0.475332	0.366	0.115	0	VZ
Hspa5	1.49146e-160	0.475129	0.724	0.543	3.50955e-156	VZ
Mtap	0	0.473543	0.389	0.125	0	VZ
Spc24	2.38871e-262	0.473513	0.6	0.315	5.62088e-258	VZ
Nectin3	0	0.472885	0.28	0.036	0	VZ
Chaf1a	2.55312e-255	0.472602	0.498	0.242	6.00775e-251	VZ
Hmgn5	6.44368e-250	0.47247	0.621	0.347	1.51626e-245	VZ
Hnrnpd	0	0.472335	0.968	0.913	0	VZ
Ak2	1.43511e-244	0.470875	0.649	0.398	3.37695e-240	VZ
Tmpo	0	0.470023	0.941	0.778	0	VZ
Rps17	0	0.469587	0.973	0.935	0	VZ
Rfc4	1.18678e-234	0.468841	0.615	0.366	2.79262e-230	VZ
Adgrv1	0	0.468721	0.263	0.029	0	VZ
Sox3	5.59015e-308	0.467262	0.349	0.105	1.31542e-303	VZ
Hikeshi	1.14716e-298	0.464835	0.399	0.145	2.69938e-294	VZ
Ccdc34	9.12127e-258	0.463978	0.852	0.642	2.14633e-253	VZ
Lmnb1	4.67724e-303	0.463803	0.938	0.818	1.1006e-298	VZ
Erg28	0	0.462575	0.36	0.115	0	VZ
Knstrn	5.28894e-200	0.462512	0.519	0.278	1.24454e-195	VZ
Hist1h1e	1.37475e-124	0.461808	0.438	0.271	3.23492e-120	VZ
Sema5a	1.58764e-232	0.460926	0.23	0.057	3.73587e-228	VZ
Pbdc1	5.56985e-254	0.459134	0.548	0.29	1.31064e-249	VZ
Gnai2	0	0.458457	0.979	0.923	0	VZ
Tceal9	3.21749e-260	0.458401	0.574	0.263	7.57108e-256	VZ
Carnmt1	0	0.458263	0.315	0.074	0	VZ
Golim4	1.86847e-247	0.457124	0.496	0.242	4.39669e-243	VZ
Ppp4r3b	7.62776e-282	0.456569	0.387	0.141	1.79489e-277	VZ
Ccnb1	3.21299e-174	0.456208	0.497	0.275	7.56049e-170	VZ
Mid1	1.04826e-245	0.456151	0.436	0.195	2.46667e-241	VZ
Fam181b	6.0701e-192	0.45584	0.329	0.141	1.42835e-187	VZ
Ddx39	7.79428e-211	0.454067	0.598	0.366	1.83407e-206	VZ
Pbk	1.00721e-250	0.453536	0.591	0.304	2.37005e-246	VZ
Thrap3	1.48066e-237	0.452801	0.816	0.625	3.48413e-233	VZ
Add3	0	0.452307	0.316	0.076	0	VZ
Nolc1	3.25801e-227	0.449444	0.59	0.344	7.66641e-223	VZ
Cenpw	5.49298e-256	0.449324	0.478	0.224	1.29255e-251	VZ
Notch2	0	0.447739	0.217	0.027	0	VZ
Mettl1	3.80974e-303	0.447699	0.326	0.093	8.9647e-299	VZ
Tfdp2	3.71207e-201	0.446878	0.624	0.382	8.73486e-197	VZ
Slc12a2	1.7653e-217	0.446265	0.347	0.142	4.15392e-213	VZ
Rpl30	0	0.446194	0.977	0.961	0	VZ
Cldnd1	1.05425e-284	0.445493	0.373	0.131	2.48075e-280	VZ
Gas1	1.07157e-118	0.445238	0.253	0.12	2.52151e-114	VZ
Gpx8	0	0.443522	0.276	0.046	0	VZ
Ccnd3	1.59885e-261	0.442635	0.414	0.17	3.76225e-257	VZ
Lfng	0	0.442448	0.23	0.024	0	VZ
Smc4	9.37964e-239	0.442197	0.759	0.462	2.20712e-234	VZ
Lsm6	1.74265e-255	0.440308	0.879	0.689	4.10063e-251	VZ
Tcf7l1	0	0.440064	0.244	0.029	0	VZ
Nucks1	8.97804e-269	0.43943	0.937	0.801	2.11262e-264	VZ
Fgfr1	2.69594e-221	0.439048	0.444	0.213	6.34383e-217	VZ
Ssr1	3.62866e-210	0.438018	0.676	0.443	8.53859e-206	VZ
Wdr76	4.78046e-242	0.437649	0.422	0.185	1.12489e-237	VZ
Fn1	1.42586e-294	0.437309	0.319	0.092	3.35519e-290	VZ
Fignl1	4.58806e-283	0.43605	0.389	0.145	1.07962e-278	VZ
Mcrip1	2.16465e-271	0.435985	0.421	0.167	5.09364e-267	VZ
Gspt1	1.61053e-211	0.435879	0.707	0.494	3.78973e-207	VZ
Gkap1	5.69789e-224	0.435764	0.717	0.472	1.34077e-219	VZ
Msn	6.25058e-250	0.43533	0.485	0.231	1.47083e-245	VZ
Sept11	9.10974e-181	0.43519	0.834	0.662	2.14361e-176	VZ
Prc1	8.74209e-142	0.43493	0.518	0.307	2.0571e-137	VZ
Fam133b	1.55634e-210	0.433178	0.588	0.352	3.66222e-206	VZ
Larp7	1.02207e-244	0.432897	0.485	0.235	2.40504e-240	VZ
Lsm5	3.95373e-247	0.43251	0.83	0.597	9.30353e-243	VZ
Ascl1	2.946e-76	0.431351	0.735	0.607	6.93222e-72	VZ
Rps12	0	0.431273	0.996	0.989	0	VZ
Gsr	3.22207e-272	0.430838	0.363	0.128	7.58184e-268	VZ
mt-Nd4l	4.35917e-224	0.429302	0.553	0.289	1.02576e-219	VZ
Atp1a1	1.40643e-299	0.42879	0.338	0.101	3.30947e-295	VZ
Hs2st1	7.93308e-184	0.428653	0.556	0.329	1.86673e-179	VZ
Rrs1	1.15209e-227	0.4276	0.439	0.207	2.71098e-223	VZ
Kdelr2	2.7292e-212	0.427512	0.552	0.309	6.42207e-208	VZ
Rps8	0	0.427478	0.998	0.997	0	VZ
Slf1	6.08245e-295	0.426952	0.316	0.09	1.43126e-290	VZ
Ddx21	7.71174e-214	0.426305	0.528	0.289	1.81465e-209	VZ
Tpx2	4.51199e-172	0.425996	0.565	0.33	1.06172e-167	VZ
Abce1	8.16027e-207	0.425177	0.57	0.336	1.92019e-202	VZ
Cdt1	5.2586e-256	0.424474	0.319	0.104	1.2374e-251	VZ
Pds5a	7.54854e-222	0.423866	0.489	0.249	1.77625e-217	VZ
Rpsa	0	0.423745	0.999	0.997	0	VZ
Slc22a23	7.84366e-266	0.423342	0.288	0.081	1.84569e-261	VZ
Sfxn1	6.50808e-208	0.423035	0.569	0.33	1.53142e-203	VZ
Stag2	2.84484e-207	0.422656	0.565	0.323	6.6942e-203	VZ
Srm	3.01751e-205	0.422569	0.528	0.294	7.10051e-201	VZ
Pkm	1.51378e-259	0.422297	0.949	0.888	3.56208e-255	VZ
Txndc5	1.01544e-290	0.422006	0.268	0.061	2.38944e-286	VZ
Mns1	4.2688e-243	0.420909	0.365	0.144	1.00449e-238	VZ
Kbtbd11	5.96446e-271	0.420828	0.233	0.048	1.4035e-266	VZ
Cacybp	4.53748e-236	0.420358	0.9	0.791	1.06771e-231	VZ
Rhoc	6.52913e-273	0.420131	0.331	0.107	1.53637e-268	VZ
Prim1	2.23191e-200	0.419902	0.507	0.273	5.2519e-196	VZ
Rrm1	5.08485e-217	0.419788	0.663	0.406	1.19652e-212	VZ
Galk1	1.42894e-292	0.419637	0.325	0.097	3.36244e-288	VZ
Vegfb	2.04299e-206	0.419502	0.452	0.227	4.80736e-202	VZ
Cd63	7.8151e-253	0.419293	0.369	0.14	1.83897e-248	VZ
Srsf2	1.54887e-306	0.418981	0.976	0.926	3.64465e-302	VZ
Selenok	8.05572e-251	0.418691	0.559	0.26	1.89559e-246	VZ
Rnps1	2.00048e-172	0.41822	0.65	0.452	4.70732e-168	VZ
Hdgfl3	1.63296e-249	0.417452	0.527	0.239	3.84252e-245	VZ
Fam162a	2.87164e-189	0.417379	0.627	0.4	6.75726e-185	VZ
Bbx	1.70308e-205	0.417334	0.44	0.215	4.00751e-201	VZ
Pou3f2	4.66606e-210	0.41696	0.704	0.438	1.09797e-205	VZ
Celsr1	0	0.415715	0.204	0.018	0	VZ
Pkn2	5.26495e-193	0.413057	0.705	0.479	1.2389e-188	VZ
Gpi1	5.43359e-193	0.412726	0.556	0.33	1.27858e-188	VZ
Ipo7	4.16194e-258	0.411852	0.377	0.144	9.79347e-254	VZ
Rpl31	5.67515e-269	0.411697	0.937	0.862	1.33542e-264	VZ
Ptma	0	0.410984	1	0.999	0	VZ
Rps15	0	0.41023	0.976	0.957	0	VZ
Tmem97	4.65369e-289	0.409944	0.283	0.072	1.09506e-284	VZ
Ptp4a2	1.25884e-232	0.409895	0.925	0.799	2.96219e-228	VZ
Vit	0	0.407934	0.213	0.02	0	VZ
Casp8ap2	1.50449e-180	0.407785	0.692	0.473	3.54021e-176	VZ
Hnrnpa3	1.45687e-281	0.406617	0.969	0.906	3.42816e-277	VZ
Snrpf	1.21794e-255	0.406562	0.94	0.817	2.86593e-251	VZ
Nudcd2	1.85364e-202	0.405857	0.734	0.494	4.36179e-198	VZ
Ndufb4	3.08004e-200	0.404868	0.501	0.264	7.24765e-196	VZ
Sptssa	3.46312e-183	0.404822	0.699	0.486	8.14906e-179	VZ
Plk4	8.08517e-192	0.404518	0.488	0.262	1.90252e-187	VZ
Fmc1	3.92389e-270	0.402301	0.323	0.102	9.23331e-266	VZ
Mlec	2.35949e-209	0.401537	0.403	0.183	5.55212e-205	VZ
Hdgfl2	2.72142e-251	0.399704	0.354	0.13	6.40378e-247	VZ
Ppp4r3a	1.7209e-249	0.399672	0.367	0.137	4.04944e-245	VZ
Utp11	1.30285e-266	0.398684	0.329	0.108	3.06574e-262	VZ
Cenpq	4.48785e-214	0.39832	0.435	0.208	1.05604e-209	VZ
Sms	9.42636e-183	0.397931	0.783	0.593	2.21812e-178	VZ
Esco2	8.83253e-152	0.397868	0.382	0.198	2.07838e-147	VZ
Rpa1	1.51432e-212	0.397854	0.4	0.181	3.56334e-208	VZ
Prrx1	2.68741e-302	0.397818	0.213	0.029	6.32374e-298	VZ
Insig1	1.8498e-177	0.397685	0.405	0.2	4.35277e-173	VZ
Spata13	2.03274e-259	0.397668	0.328	0.109	4.78325e-255	VZ
Peli2	4.30652e-202	0.396804	0.291	0.106	1.01337e-197	VZ
Pold3	5.38011e-199	0.396545	0.472	0.243	1.26599e-194	VZ
Acaa2	9.44193e-297	0.396404	0.263	0.057	2.22178e-292	VZ
Snrpb	1.34522e-242	0.396345	0.92	0.831	3.16543e-238	VZ
Chaf1b	8.89965e-200	0.396283	0.373	0.165	2.09418e-195	VZ
D10Wsu102e	4.68765e-166	0.396246	0.469	0.262	1.10305e-161	VZ
Asf1a	1.29438e-189	0.39584	0.744	0.533	3.0458e-185	VZ
Jpt1	3.17345e-224	0.395761	0.625	0.287	7.46745e-220	VZ
Racgap1	8.76406e-165	0.395727	0.593	0.363	2.06227e-160	VZ
Scd2	1.86604e-124	0.39553	0.892	0.794	4.39098e-120	VZ
Fen1	7.10852e-199	0.394845	0.445	0.225	1.67271e-194	VZ
Ncapg2	1.15732e-229	0.394619	0.34	0.13	2.72329e-225	VZ
Pgpep1	9.30704e-158	0.394595	0.319	0.146	2.19004e-153	VZ
Suclg2	0	0.394228	0.238	0.029	0	VZ
Rex1bd	5.06549e-240	0.39251	0.4	0.163	1.19196e-235	VZ
Exosc8	4.74405e-178	0.391733	0.595	0.376	1.11632e-173	VZ
2810004N23Rik	6.50997e-191	0.391684	0.541	0.31	1.53186e-186	VZ
U2af1	3.35874e-177	0.391667	0.853	0.747	7.90345e-173	VZ
Aif1l	1.08845e-228	0.391267	0.316	0.112	2.56122e-224	VZ
Ssrp1	2.14623e-193	0.391026	0.837	0.66	5.05029e-189	VZ
Rnaseh2c	1.452e-180	0.390125	0.707	0.485	3.4167e-176	VZ
Id1	3.1634e-215	0.390022	0.171	0.029	7.4438e-211	VZ
Smchd1	5.64796e-171	0.389639	0.721	0.515	1.32902e-166	VZ
Ndufab1	6.28378e-189	0.389538	0.81	0.655	1.47864e-184	VZ
Msi1	1.16172e-139	0.388814	0.702	0.509	2.73365e-135	VZ
Kif21a	4.47171e-158	0.388734	0.784	0.598	1.05224e-153	VZ
Rsl1d1	1.7722e-156	0.388543	0.762	0.602	4.17016e-152	VZ
Wdr12	9.07527e-197	0.388377	0.433	0.212	2.1355e-192	VZ
Brca2	5.338e-211	0.388178	0.339	0.137	1.25608e-206	VZ
Tead2	5.91073e-218	0.387475	0.897	0.628	1.39085e-213	VZ
Cntln	1.35007e-210	0.387289	0.357	0.149	3.17684e-206	VZ
Tsen15	2.49346e-228	0.387126	0.363	0.147	5.86735e-224	VZ
Pnp	1.43748e-255	0.38628	0.33	0.112	3.38254e-251	VZ
Banf1	3.51572e-213	0.386182	0.874	0.713	8.27283e-209	VZ
Tomm5	1.8597e-161	0.38578	0.703	0.502	4.37606e-157	VZ
Cops9	7.2489e-225	0.385293	0.437	0.193	1.70574e-220	VZ
Hspa8	7.44222e-107	0.384987	0.897	0.877	1.75123e-102	VZ
Nckap5	1.43776e-248	0.384231	0.254	0.065	3.38319e-244	VZ
Ifrd1	3.88554e-166	0.383815	0.512	0.301	9.14307e-162	VZ
Prom1	1.02169e-226	0.383234	0.362	0.144	2.40415e-222	VZ
Sf3b3	2.24876e-172	0.3831	0.607	0.39	5.29155e-168	VZ
Srsf7	2.53098e-222	0.382532	0.934	0.839	5.95566e-218	VZ
Umps	6.06303e-231	0.382526	0.349	0.134	1.42669e-226	VZ
Rpl10a	5.12006e-308	0.381853	0.981	0.965	1.2048e-303	VZ
Mier1	9.58013e-170	0.381775	0.528	0.309	2.2543e-165	VZ
Rbmxl1	2.36647e-176	0.381363	0.787	0.597	5.56855e-172	VZ
Ccnb2	1.87904e-157	0.380677	0.469	0.258	4.42158e-153	VZ
E2f1	1.84091e-168	0.380335	0.421	0.216	4.33186e-164	VZ
Snhg18	1.68175e-288	0.380231	0.207	0.029	3.95732e-284	VZ
Bola3	7.9643e-180	0.379906	0.471	0.255	1.87408e-175	VZ
Dnajc19	1.31358e-203	0.379846	0.466	0.235	3.09099e-199	VZ
Cenpk	1.20113e-212	0.379307	0.362	0.152	2.82637e-208	VZ
Polr2h	4.1667e-187	0.379106	0.528	0.296	9.80466e-183	VZ
Ccne1	6.2647e-214	0.37867	0.284	0.096	1.47415e-209	VZ
Ptpru	1.26019e-300	0.378539	0.207	0.026	2.96535e-296	VZ
Jag1	5.56645e-262	0.377561	0.186	0.025	1.30984e-257	VZ
Rdm1	5.27257e-227	0.376768	0.348	0.135	1.24069e-222	VZ
Amd1	3.83859e-187	0.376087	0.396	0.188	9.03258e-183	VZ
Cks2	1.02139e-167	0.376015	0.622	0.382	2.40344e-163	VZ
Rps20	0	0.375897	0.998	0.993	0	VZ
C1qbp	1.70722e-151	0.375857	0.747	0.581	4.01727e-147	VZ
Tex9	3.38283e-197	0.375799	0.416	0.196	7.96013e-193	VZ
Pdia3	1.47646e-131	0.375706	0.642	0.462	3.47426e-127	VZ
Exo1	5.92036e-221	0.375636	0.333	0.127	1.39312e-216	VZ
Prelid3b	6.8937e-219	0.375616	0.359	0.144	1.62216e-214	VZ
Fasn	1.33569e-166	0.375488	0.521	0.305	3.14301e-162	VZ
Spred1	4.43429e-191	0.375293	0.431	0.213	1.04343e-186	VZ
Psip1	4.4126e-267	0.374931	0.973	0.931	1.03833e-262	VZ
Txnl1	1.41164e-168	0.374883	0.825	0.688	3.32174e-164	VZ
Lbr	4.33798e-175	0.374644	0.457	0.242	1.02077e-170	VZ
Cbx5	3.71809e-210	0.374517	0.929	0.805	8.74903e-206	VZ
Zfp638	3.69062e-205	0.374301	0.468	0.222	8.6844e-201	VZ
Psmg4	8.59926e-165	0.373751	0.667	0.454	2.02349e-160	VZ
Akr1b3	1.39523e-201	0.373484	0.448	0.223	3.28312e-197	VZ
Tmed10	1.23991e-141	0.373459	0.676	0.489	2.91763e-137	VZ
Ajuba	0	0.373249	0.195	0.018	0	VZ
Wee1	9.01885e-218	0.372995	0.333	0.13	2.12223e-213	VZ
Rhbdl3	1.00784e-231	0.372862	0.195	0.037	2.37154e-227	VZ
Epha3	5.94899e-82	0.372453	0.618	0.475	1.39986e-77	VZ
Bub1b	8.20389e-152	0.372334	0.38	0.197	1.93046e-147	VZ
Cop1	1.57216e-213	0.371746	0.407	0.178	3.69945e-209	VZ
Trip6	0	0.370812	0.21	0.021	0	VZ
Trps1	2.30152e-224	0.370506	0.279	0.089	5.4157e-220	VZ
Tcof1	9.50482e-180	0.370201	0.506	0.283	2.23658e-175	VZ
Sox8	1.09281e-270	0.369681	0.233	0.046	2.57149e-266	VZ
Tead1	3.19062e-162	0.369434	0.599	0.368	7.50784e-158	VZ
Dnph1	8.67495e-231	0.369059	0.34	0.129	2.0413e-226	VZ
Ddx18	2.26775e-161	0.368763	0.504	0.295	5.33624e-157	VZ
Stox2	1.03736e-136	0.368175	0.768	0.6	2.44101e-132	VZ
Mrpl42	1.79397e-160	0.367936	0.792	0.621	4.2214e-156	VZ
Mrpl13	1.93797e-156	0.367803	0.683	0.478	4.56023e-152	VZ
Dhcr24	3.51577e-205	0.36716	0.275	0.092	8.27295e-201	VZ
Eif2s1	9.77248e-151	0.366716	0.664	0.475	2.29956e-146	VZ
Uri1	2.4956e-178	0.365616	0.476	0.256	5.87241e-174	VZ
Ost4	1.49042e-155	0.365319	0.722	0.516	3.5071e-151	VZ
Ank2	6.99534e-168	0.364768	0.721	0.51	1.64607e-163	VZ
Ctnnb1	5.61099e-213	0.364616	0.948	0.871	1.32032e-208	VZ
Cks1b	5.35023e-226	0.364506	0.838	0.563	1.25896e-221	VZ
RP23-239I17.4	8.39396e-83	0.364376	0.162	0.071	1.97518e-78	VZ
Pgp	4.84091e-158	0.364259	0.51	0.301	1.13912e-153	VZ
Dab1	2.40537e-230	0.364006	0.264	0.075	5.66008e-226	VZ
Nudt5	6.48602e-168	0.363975	0.566	0.345	1.52623e-163	VZ
Etfa	3.34938e-181	0.363422	0.435	0.224	7.88142e-177	VZ
Col2a1	4.20155e-238	0.3628	0.17	0.023	9.88666e-234	VZ
Eprs	1.61682e-150	0.362603	0.74	0.56	3.80453e-146	VZ
Rcc2	8.34001e-186	0.362112	0.881	0.716	1.96249e-181	VZ
Hey1	4.1652e-254	0.361691	0.196	0.032	9.80114e-250	VZ
Rtraf	1.46195e-236	0.361272	0.61	0.278	3.44012e-232	VZ
Bmpr1a	8.18664e-176	0.361154	0.469	0.251	1.9264e-171	VZ
Ttc14	2.29029e-165	0.361118	0.607	0.384	5.38927e-161	VZ
Shisa2	2.68982e-72	0.361087	0.262	0.156	6.32942e-68	VZ
Calu	1.14797e-169	0.36093	0.471	0.258	2.70128e-165	VZ
Elovl6	7.77414e-148	0.360147	0.482	0.28	1.82933e-143	VZ
Cct3	6.27866e-150	0.360115	0.848	0.76	1.47743e-145	VZ
Bcl2l12	2.68164e-287	0.360041	0.246	0.05	6.31016e-283	VZ
Eef1b2	6.28863e-297	0.35939	0.988	0.963	1.47978e-292	VZ
Eny2	6.43232e-184	0.358612	0.869	0.704	1.51359e-179	VZ
Orc6	2.30093e-131	0.3578	0.626	0.437	5.41433e-127	VZ
Cenps	1.03301e-263	0.357604	0.257	0.064	2.43077e-259	VZ
Acsl3	3.73001e-155	0.35756	0.51	0.301	8.7771e-151	VZ
Vars	5.74379e-166	0.356953	0.521	0.304	1.35157e-161	VZ
Smim10l1	2.73663e-205	0.356758	0.376	0.16	6.43956e-201	VZ
Fkbp4	1.17241e-169	0.356182	0.871	0.76	2.75879e-165	VZ
Mapkapk2	6.78728e-121	0.356149	0.5	0.321	1.59712e-116	VZ
Dmac1	2.2286e-228	0.355879	0.32	0.113	5.24412e-224	VZ
Srsf10	7.36059e-171	0.355829	0.886	0.729	1.73202e-166	VZ
Selenot	5.18471e-216	0.355738	0.336	0.129	1.22001e-211	VZ
Pcnp	3.3545e-158	0.355662	0.812	0.629	7.89347e-154	VZ
Tmem165	2.80313e-151	0.355316	0.595	0.384	6.59605e-147	VZ
Kif11	2.02288e-131	0.354852	0.477	0.277	4.76003e-127	VZ
Ncapg	8.26941e-151	0.354616	0.38	0.196	1.94588e-146	VZ
Rpl3	0	0.3542	0.992	0.986	0	VZ
Gja1	0	0.353308	0.186	0.011	0	VZ
Timeless	2.91583e-190	0.3532	0.413	0.197	6.86123e-186	VZ
Cdh11	1.61951e-253	0.352262	0.227	0.048	3.81087e-249	VZ
Sf3b5	3.85264e-160	0.3518	0.781	0.605	9.06564e-156	VZ
Zfp24	6.39679e-206	0.351601	0.349	0.141	1.50523e-201	VZ
Dleu7	3.93582e-80	0.351598	0.321	0.196	9.26138e-76	VZ
Msh6	3.76804e-183	0.351388	0.334	0.144	8.86658e-179	VZ
Incenp	4.00201e-131	0.35102	0.461	0.271	9.41713e-127	VZ
Mphosph10	1.14664e-166	0.350939	0.468	0.257	2.69815e-162	VZ
Kcnk10	2.43574e-174	0.350492	0.367	0.172	5.73154e-170	VZ
Id3	1.11792e-150	0.350313	0.158	0.04	2.63057e-146	VZ
Smc6	1.11523e-143	0.350266	0.811	0.639	2.62426e-139	VZ
Cdk1	2.42921e-164	0.349958	0.513	0.283	5.71618e-160	VZ
Gstm5	2.897e-138	0.349913	0.642	0.445	6.81693e-134	VZ
Rfc2	4.40605e-147	0.349791	0.57	0.365	1.03679e-142	VZ
Cntrl	2.2192e-144	0.349704	0.467	0.267	5.22199e-140	VZ
Ivns1abp	4.31245e-154	0.349669	0.809	0.623	1.01476e-149	VZ
0610012G03Rik	3.96587e-163	0.349647	0.481	0.271	9.33209e-159	VZ
Pole3	4.30131e-152	0.349278	0.583	0.373	1.01214e-147	VZ
Nkx2-3	1.19595e-165	0.349226	0.263	0.101	2.8142e-161	VZ
Cenph	3.00757e-173	0.348973	0.366	0.173	7.07711e-169	VZ
Pcgf5	7.18069e-272	0.347804	0.218	0.039	1.68969e-267	VZ
Tacc3	2.65908e-146	0.347568	0.43	0.236	6.25709e-142	VZ
Npas3	7.64876e-111	0.347467	0.455	0.287	1.79983e-106	VZ
Rgma	4.43275e-189	0.347403	0.377	0.169	1.04307e-184	VZ
Hsph1	1.65303e-143	0.347277	0.499	0.298	3.88975e-139	VZ
Lrrc58	1.50259e-143	0.347184	0.585	0.376	3.53574e-139	VZ
Smco4	8.68331e-259	0.34702	0.241	0.055	2.04327e-254	VZ
Mt1	5.84596e-191	0.346897	0.205	0.054	1.37561e-186	VZ
E2f3	7.09456e-188	0.346731	0.348	0.152	1.66942e-183	VZ
Heg1	4.75228e-180	0.345522	0.299	0.119	1.11826e-175	VZ
Hsd17b12	3.939e-145	0.345113	0.563	0.354	9.26885e-141	VZ
Rps26	0	0.344977	0.994	0.989	0	VZ
Gpr98	1.91367e-124	0.344717	0.14	0.04	4.50305e-120	VZ
Gdi2	1.93504e-133	0.343958	0.877	0.795	4.55334e-129	VZ
Bri3bp	1.42856e-168	0.343925	0.405	0.203	3.36155e-164	VZ
Gldc	7.08758e-223	0.343755	0.268	0.083	1.66778e-218	VZ
Rps25	1.14078e-226	0.34373	0.969	0.937	2.68438e-222	VZ
Hs6st2	1.12539e-207	0.343317	0.249	0.075	2.64815e-203	VZ
Hmg20b	1.98356e-148	0.342781	0.623	0.406	4.66752e-144	VZ
Ppat	1.48287e-218	0.342283	0.291	0.099	3.48934e-214	VZ
Ssx2ip	7.97764e-185	0.342243	0.339	0.145	1.87722e-180	VZ
Fxn	4.10917e-157	0.342071	0.431	0.23	9.66929e-153	VZ
Svbp	1.36306e-205	0.342016	0.401	0.176	3.20742e-201	VZ
Actn1	5.71214e-186	0.341881	0.266	0.094	1.34412e-181	VZ
Fhl1	3.20409e-171	0.341679	0.28	0.109	7.53954e-167	VZ
Snrpa1	1.40405e-139	0.341414	0.74	0.568	3.30388e-135	VZ
Etf1	1.89204e-146	0.341383	0.635	0.43	4.45217e-142	VZ
Ndufaf8	1.59531e-227	0.341198	0.285	0.092	3.75393e-223	VZ
Cd164	1.49328e-179	0.341063	0.333	0.143	3.51384e-175	VZ
2900097C17Rik	3.25926e-195	0.340817	0.441	0.207	7.66938e-191	VZ
Cul1	1.04593e-138	0.340556	0.676	0.475	2.46119e-134	VZ
Mtdh	2.55121e-155	0.340423	0.88	0.749	6.00325e-151	VZ
Trim59	3.92991e-126	0.340302	0.555	0.358	9.24746e-122	VZ
Rrp15	1.50762e-194	0.340148	0.348	0.146	3.54758e-190	VZ
Gmps	6.66167e-133	0.340101	0.647	0.456	1.56756e-128	VZ
Syt11	5.27652e-97	0.339578	0.882	0.781	1.24162e-92	VZ
Shisa4	5.26676e-154	0.339436	0.45	0.245	1.23932e-149	VZ
Rangrf	1.00705e-200	0.339329	0.28	0.098	2.36969e-196	VZ
Cenpa	7.22992e-171	0.339078	0.663	0.409	1.70127e-166	VZ
Dag1	1.35223e-159	0.339038	0.366	0.176	3.18194e-155	VZ
Eif3a	9.3521e-182	0.33862	0.938	0.871	2.20064e-177	VZ
Adgra3	6.58801e-230	0.338455	0.269	0.08	1.55022e-225	VZ
Tmem107	7.43624e-213	0.338417	0.261	0.081	1.74982e-208	VZ
Mms22l	1.36511e-173	0.338346	0.37	0.175	3.21224e-169	VZ
Fbxo5	3.683e-126	0.338344	0.464	0.275	8.66647e-122	VZ
Tmem245	8.24246e-165	0.338074	0.339	0.154	1.93953e-160	VZ
Baz1a	1.82964e-144	0.33782	0.478	0.278	4.30533e-140	VZ
Samd4	1.00747e-294	0.337719	0.177	0.014	2.37068e-290	VZ
Gatad2a	1.65807e-149	0.337159	0.509	0.302	3.90161e-145	VZ
Rpl7l1	9.56136e-130	0.336971	0.594	0.404	2.24988e-125	VZ
Birc5	9.55809e-181	0.336928	0.669	0.386	2.24911e-176	VZ
Lsamp	5.50112e-208	0.336608	0.321	0.12	1.29447e-203	VZ
Chek1	1.49302e-195	0.336497	0.309	0.12	3.51322e-191	VZ
Itgb3bp	6.80466e-172	0.336313	0.396	0.196	1.6012e-167	VZ
Stoml2	2.17848e-139	0.335796	0.626	0.428	5.12619e-135	VZ
Tnfaip8	5.73054e-296	0.335526	0.192	0.021	1.34845e-291	VZ
Eno1	2.37187e-120	0.335402	0.53	0.34	5.58125e-116	VZ
Rai14	2.62497e-144	0.334903	0.323	0.156	6.17683e-140	VZ
Tle1	5.14255e-130	0.334866	0.67	0.461	1.21009e-125	VZ
Gpm6b	1.02004e-83	0.334753	0.832	0.725	2.40025e-79	VZ
Nxt1	3.16174e-139	0.334312	0.568	0.363	7.43988e-135	VZ
Top2a	4.35838e-169	0.334152	0.714	0.443	1.02557e-164	VZ
Tjp2	1.71114e-220	0.334028	0.255	0.075	4.02649e-216	VZ
Esf1	1.58419e-127	0.33384	0.606	0.414	3.72776e-123	VZ
Fat1	1.31131e-183	0.333763	0.304	0.121	3.08565e-179	VZ
Alyref	4.48787e-160	0.333215	0.831	0.658	1.05604e-155	VZ
Fbln1	1.64951e-173	0.332972	0.362	0.168	3.88145e-169	VZ
Atad5	4.83212e-143	0.332872	0.441	0.249	1.13705e-138	VZ
Wdr43	1.19617e-150	0.332568	0.458	0.256	2.81472e-146	VZ
Abcd3	7.00686e-171	0.331967	0.358	0.166	1.64878e-166	VZ
Wscd1	1.18379e-199	0.331811	0.266	0.088	2.78559e-195	VZ
Rfx4	1.17568e-239	0.331325	0.197	0.036	2.7665e-235	VZ
Ppid	1.27469e-128	0.331143	0.6	0.414	2.99947e-124	VZ
Pappa	5.17712e-250	0.330588	0.167	0.018	1.21823e-245	VZ
Inppl1	3.06761e-219	0.329903	0.259	0.077	7.21839e-215	VZ
Mydgf	1.78793e-219	0.329874	0.286	0.094	4.20717e-215	VZ
Ssr3	4.88843e-132	0.32965	0.665	0.466	1.1503e-127	VZ
Fubp1	1.80541e-169	0.329578	0.938	0.89	4.24831e-165	VZ
Tfam	2.10379e-140	0.329508	0.499	0.299	4.95044e-136	VZ
Anxa5	7.47699e-264	0.328991	0.201	0.032	1.75941e-259	VZ
Bag2	6.49225e-264	0.328231	0.203	0.033	1.52769e-259	VZ
Pold2	2.6587e-187	0.3276	0.332	0.139	6.25618e-183	VZ
Rab1a	5.35732e-201	0.327516	0.421	0.188	1.26063e-196	VZ
Gng12	1.63961e-248	0.327012	0.193	0.032	3.85817e-244	VZ
Prpf4b	3.9646e-131	0.326554	0.778	0.613	9.32911e-127	VZ
Nt5dc2	3.84693e-141	0.326324	0.852	0.657	9.05222e-137	VZ
Atp1a2	8.96319e-187	0.326306	0.111	0.007	2.10913e-182	VZ
Pou3f3	7.53945e-132	0.326085	0.881	0.729	1.77411e-127	VZ
Dtd2	1.31761e-234	0.326033	0.234	0.058	3.10046e-230	VZ
RP23-65G17.3	1.91862e-28	0.326007	0.198	0.144	4.5147e-24	VZ
Rdx	1.09913e-166	0.325786	0.907	0.789	2.58636e-162	VZ
Arl6ip6	2.47833e-123	0.325534	0.627	0.44	5.83175e-119	VZ
Ctdspl2	9.81863e-137	0.325215	0.486	0.289	2.31042e-132	VZ
Eif4ebp1	1.96779e-266	0.325193	0.203	0.032	4.6304e-262	VZ
Pum3	3.47821e-216	0.325162	0.27	0.085	8.18457e-212	VZ
Dhx32	3.9962e-180	0.324933	0.316	0.131	9.40346e-176	VZ
Rpl32	0	0.323953	0.998	0.995	0	VZ
Melk	4.02613e-157	0.323785	0.331	0.154	9.4739e-153	VZ
Shroom3	2.12379e-219	0.323303	0.187	0.036	4.99748e-215	VZ
Gtf3a	5.94555e-132	0.323303	0.483	0.288	1.39905e-127	VZ
Tra2a	4.0237e-104	0.323062	0.757	0.633	9.46816e-100	VZ
Sgo1	8.30249e-201	0.323047	0.215	0.058	1.95366e-196	VZ
Higd1a	1.60455e-122	0.322893	0.649	0.461	3.77568e-118	VZ
Mybbp1a	4.08111e-157	0.322492	0.42	0.22	9.60327e-153	VZ
Pmf1	2.47469e-157	0.322216	0.438	0.236	5.82318e-153	VZ
Ezh2	1.12502e-151	0.321422	0.933	0.847	2.64729e-147	VZ
Nol7	3.99863e-130	0.321207	0.805	0.659	9.40918e-126	VZ
Myl12a	2.50791e-129	0.32089	0.636	0.437	5.90135e-125	VZ
Nudc	9.26256e-133	0.320388	0.817	0.682	2.17957e-128	VZ
Veph1	4.68752e-219	0.320345	0.128	0.008	1.10302e-214	VZ
Hspa14	3.99835e-140	0.319828	0.514	0.315	9.40852e-136	VZ
Afdn	1.68112e-172	0.319687	0.391	0.183	3.95584e-168	VZ
Dusp16	1.64186e-243	0.319416	0.206	0.04	3.86346e-239	VZ
Parp1	2.83025e-131	0.319362	0.811	0.658	6.65985e-127	VZ
Calr	7.81398e-87	0.318941	0.826	0.731	1.83871e-82	VZ
Palld	1.71673e-159	0.318902	0.392	0.195	4.03963e-155	VZ
Magoh	1.52363e-125	0.318809	0.759	0.608	3.58526e-121	VZ
Rps13	9.32835e-280	0.318702	0.99	0.987	2.19505e-275	VZ
Lsm7	1.2192e-119	0.31866	0.626	0.443	2.8689e-115	VZ
Npm3	2.99703e-147	0.318454	0.445	0.248	7.05231e-143	VZ
Sae1	1.39659e-123	0.31838	0.721	0.545	3.28631e-119	VZ
Ect2	2.20818e-133	0.318222	0.366	0.192	5.19606e-129	VZ
Tjp1	2.59892e-193	0.317981	0.281	0.101	6.11552e-189	VZ
Pgls	3.11994e-124	0.317853	0.77	0.61	7.34154e-120	VZ
Dbf4	1.5557e-119	0.317796	0.531	0.335	3.66073e-115	VZ
Ubr7	1.91299e-150	0.317776	0.376	0.19	4.50146e-146	VZ
Bud23	1.1356e-207	0.317608	0.274	0.091	2.67218e-203	VZ
Tbrg1	6.46098e-131	0.316608	0.523	0.326	1.52033e-126	VZ
Smc2	6.02707e-195	0.316452	0.789	0.496	1.41823e-190	VZ
Sfr1	4.88126e-138	0.316424	0.884	0.781	1.14861e-133	VZ
Plekha7	1.26941e-251	0.316369	0.178	0.024	2.98704e-247	VZ
S1pr1	6.12061e-259	0.316059	0.153	0.01	1.44024e-254	VZ
Trim37	1.75109e-121	0.315603	0.586	0.396	4.12049e-117	VZ
Rad50	1.52005e-147	0.31546	0.363	0.181	3.57683e-143	VZ
Smim15	4.70165e-145	0.315056	0.416	0.225	1.10635e-140	VZ
Gart	9.76257e-162	0.315055	0.379	0.186	2.29723e-157	VZ
Kif23	4.2172e-109	0.31487	0.359	0.203	9.92349e-105	VZ
Mrpl33	3.93242e-122	0.314659	0.64	0.45	9.25339e-118	VZ
Adss	2.03215e-140	0.314585	0.482	0.281	4.78186e-136	VZ
Prkd3	6.63044e-130	0.314423	0.515	0.313	1.56021e-125	VZ
Psph	2.38361e-138	0.314151	0.382	0.202	5.60886e-134	VZ
Hspa4l	7.01129e-116	0.313981	0.38	0.216	1.64983e-111	VZ
Exosc7	3.8831e-136	0.313795	0.459	0.267	9.13733e-132	VZ
Zcchc3	9.43984e-118	0.313262	0.577	0.391	2.22129e-113	VZ
Apex1	8.68568e-106	0.313221	0.708	0.556	2.04383e-101	VZ
Rpl19	0	0.313114	0.996	0.994	0	VZ
Rad23a	4.33342e-131	0.313066	0.463	0.274	1.0197e-126	VZ
Rpl36a	2.02924e-150	0.312677	0.977	0.934	4.775e-146	VZ
Slc39a7	6.0627e-209	0.312242	0.25	0.075	1.42661e-204	VZ
Dnajc2	1.67058e-116	0.312098	0.772	0.611	3.93103e-112	VZ
Tspan3	8.22556e-137	0.311876	0.896	0.783	1.93556e-132	VZ
Ppic	4.13978e-246	0.311685	0.186	0.028	9.74132e-242	VZ
Mrpl17	7.80454e-121	0.311305	0.546	0.362	1.83649e-116	VZ
Rcc1	2.53802e-149	0.311154	0.377	0.191	5.97222e-145	VZ
Galnt1	6.45518e-125	0.310895	0.56	0.358	1.51897e-120	VZ
Rfc3	1.04668e-90	0.310067	0.589	0.433	2.46295e-86	VZ
Mdc1	2.70438e-150	0.310024	0.35	0.17	6.36368e-146	VZ
St13	5.59653e-136	0.309733	0.868	0.741	1.31692e-131	VZ
Eif3b	1.27988e-115	0.308779	0.619	0.434	3.01169e-111	VZ
P4hb	3.94934e-109	0.308152	0.514	0.334	9.29319e-105	VZ
Ctps	2.90368e-124	0.307949	0.558	0.366	6.83264e-120	VZ
Tspan18	5.46531e-234	0.307721	0.147	0.013	1.28604e-229	VZ
Naa20	3.78653e-124	0.307675	0.517	0.328	8.91009e-120	VZ
Spc25	8.77356e-119	0.307446	0.534	0.324	2.06451e-114	VZ
Irak1bp1	1.85268e-139	0.307398	0.378	0.197	4.35954e-135	VZ
Rpl8	0	0.307372	0.997	0.994	0	VZ
Evi5	6.26888e-136	0.307235	0.384	0.204	1.47513e-131	VZ
Tardbp	1.25684e-116	0.307111	0.823	0.666	2.95747e-112	VZ
Anp32e	9.29138e-152	0.307003	0.901	0.741	2.18635e-147	VZ
Prps1	3.92031e-149	0.306915	0.382	0.195	9.22487e-145	VZ
Ssbp1	9.97704e-121	0.306491	0.706	0.519	2.3477e-116	VZ
Zfp367	3.59205e-175	0.306311	0.23	0.075	8.45245e-171	VZ
Dnmt1	2.90013e-114	0.306306	0.607	0.419	6.8243e-110	VZ
Usp25	3.22033e-189	0.306298	0.235	0.073	7.57777e-185	VZ
Zdbf2	2.07926e-173	0.306296	0.449	0.229	4.8927e-169	VZ
Exosc3	2.96963e-139	0.306278	0.411	0.225	6.98784e-135	VZ
Bub3	1.10563e-79	0.306243	0.557	0.413	2.60165e-75	VZ
Ckap2	2.06593e-119	0.305836	0.338	0.178	4.86134e-115	VZ
Limd1	3.76446e-134	0.305811	0.464	0.27	8.85815e-130	VZ
Larp4	1.63946e-140	0.305268	0.43	0.237	3.85782e-136	VZ
Rpl26	6.03871e-240	0.305209	0.99	0.983	1.42097e-235	VZ
Aebp2	1.79237e-151	0.305132	0.367	0.18	4.21762e-147	VZ
Pabpc4	2.84536e-149	0.304861	0.375	0.188	6.69541e-145	VZ
Tbl1x	1.43086e-123	0.304817	0.639	0.447	3.36695e-119	VZ
Bub1	8.92892e-130	0.304601	0.369	0.197	2.10107e-125	VZ
Spop	7.89187e-106	0.304515	0.681	0.499	1.85704e-101	VZ
Rpl39	2.85017e-230	0.304295	0.99	0.974	6.70674e-226	VZ
Col18a1	1.49831e-259	0.304189	0.176	0.02	3.52566e-255	VZ
Lsm14a	4.73301e-121	0.303914	0.587	0.395	1.11373e-116	VZ
Shmt1	5.49899e-219	0.303872	0.219	0.054	1.29397e-214	VZ
Kif4	6.31172e-117	0.303696	0.381	0.215	1.48521e-112	VZ
Gabpb2	5.61773e-144	0.303377	0.338	0.164	1.32191e-139	VZ
Nog	1.18131e-241	0.303044	0.145	0.011	2.77973e-237	VZ
Ccne2	4.81213e-146	0.302825	0.221	0.08	1.13234e-141	VZ
Mrpl23	7.75354e-142	0.30218	0.443	0.244	1.82449e-137	VZ
Gsdme	3.95306e-206	0.301907	0.249	0.076	9.30196e-202	VZ
Mpp5	3.03041e-187	0.301436	0.249	0.082	7.13085e-183	VZ
Bet1	5.90836e-140	0.301102	0.392	0.208	1.3903e-135	VZ
Fbl	3.18165e-105	0.301013	0.674	0.519	7.48674e-101	VZ
Cd3eap	3.51256e-145	0.301003	0.297	0.132	8.26541e-141	VZ
Ftsj3	2.13978e-149	0.300886	0.352	0.17	5.03511e-145	VZ
Trim27	5.04004e-112	0.30071	0.551	0.369	1.18597e-107	VZ
Snw1	1.37999e-114	0.300703	0.673	0.496	3.24726e-110	VZ
Nsrp1	1.25099e-172	0.300681	0.278	0.107	2.94371e-168	VZ
Isoc1	2.02785e-163	0.300396	0.331	0.148	4.77172e-159	VZ
Mad2l1	3.03846e-146	0.300118	0.413	0.219	7.1498e-142	VZ
Fxr1	5.92857e-116	0.300114	0.53	0.344	1.39505e-111	VZ
Aurkb	3.01168e-92	0.299974	0.392	0.241	7.08678e-88	VZ
Hdlbp	6.74365e-120	0.299935	0.529	0.336	1.58685e-115	VZ
Reep3	7.00525e-107	0.299927	0.582	0.398	1.6484e-102	VZ
Eif4g1	8.65565e-104	0.299907	0.738	0.575	2.03676e-99	VZ
Dnajc1	9.30769e-96	0.299888	0.422	0.266	2.19019e-91	VZ
2700038G22Rik	9.04254e-141	0.299788	0.275	0.12	2.1278e-136	VZ
Nme4	7.15738e-152	0.299543	0.317	0.144	1.6842e-147	VZ
Krcc1	2.64355e-136	0.29952	0.324	0.157	6.22053e-132	VZ
Nudt21	2.11432e-141	0.299414	0.893	0.778	4.97522e-137	VZ
Smarca5	5.30699e-129	0.299322	0.919	0.827	1.24879e-124	VZ
Cad	4.51371e-202	0.29925	0.25	0.077	1.06212e-197	VZ
Neil3	1.35671e-113	0.299171	0.268	0.13	3.19247e-109	VZ
Ppp1r1a	6.59603e-136	0.299089	0.16	0.045	1.55211e-131	VZ
Zfp106	1.39546e-109	0.299082	0.591	0.404	3.28365e-105	VZ
Rps27a	0	0.298975	0.998	0.995	0	VZ
Timm9	1.19365e-124	0.298873	0.476	0.287	2.80878e-120	VZ
Polr2m	1.31038e-135	0.298711	0.915	0.812	3.08345e-131	VZ
Anxa2	6.34265e-250	0.298685	0.152	0.012	1.49249e-245	VZ
Tomm40	5.56585e-114	0.298547	0.665	0.483	1.3097e-109	VZ
Ruvbl1	4.70887e-113	0.298535	0.494	0.315	1.10804e-108	VZ
Fmr1	3.28763e-118	0.298409	0.516	0.331	7.73613e-114	VZ
Mrpl12	7.01011e-108	0.298103	0.697	0.532	1.64955e-103	VZ
Eed	1.90928e-143	0.298078	0.408	0.217	4.49273e-139	VZ
Crb2	1.85825e-233	0.297809	0.166	0.022	4.37264e-229	VZ
Lage3	7.88682e-114	0.297658	0.6	0.411	1.85585e-109	VZ
Dctd	2.78515e-241	0.296719	0.186	0.029	6.55375e-237	VZ
Lnpk	1.07769e-165	0.296576	0.338	0.148	2.5359e-161	VZ
Kcnh7	1.0599e-105	0.296576	0.331	0.182	2.49405e-101	VZ
Rpl36al	1.45072e-97	0.296506	0.774	0.63	3.41369e-93	VZ
Gpatch4	1.16345e-146	0.296244	0.321	0.149	2.73771e-142	VZ
Xpo1	1.34368e-105	0.296117	0.62	0.433	3.16182e-101	VZ
Bccip	4.27139e-133	0.295403	0.484	0.286	1.0051e-128	VZ
Mesd	2.68593e-204	0.295118	0.244	0.073	6.32026e-200	VZ
Chd1	1.25729e-105	0.294508	0.554	0.373	2.95852e-101	VZ
Srrt	4.5991e-111	0.294363	0.682	0.503	1.08221e-106	VZ
Fam172a	6.54953e-73	0.294103	0.451	0.312	1.54117e-68	VZ
Sgo2a	1.15139e-160	0.293948	0.225	0.075	2.70934e-156	VZ
Rad51ap1	1.60072e-136	0.293486	0.387	0.203	3.76666e-132	VZ
Rpl35a	3.90158e-263	0.293427	0.993	0.984	9.1808e-259	VZ
Jam3	4.03915e-120	0.293116	0.562	0.359	9.50451e-116	VZ
Eif5a	2.44549e-167	0.293082	0.972	0.955	5.75448e-163	VZ
Lrp4	1.69562e-192	0.293053	0.114	0.007	3.98996e-188	VZ
Cdh6	7.79859e-218	0.292882	0.139	0.013	1.83509e-213	VZ
Ide	5.66065e-150	0.292067	0.308	0.137	1.33201e-145	VZ
Blm	3.2997e-133	0.291819	0.357	0.185	7.76452e-129	VZ
Wnk1	1.78403e-97	0.291767	0.646	0.467	4.19801e-93	VZ
Fgfrl1	4.4333e-166	0.291599	0.282	0.111	1.0432e-161	VZ
Zfp91	8.09811e-119	0.291228	0.834	0.684	1.90557e-114	VZ
Eci1	6.28652e-179	0.291223	0.286	0.108	1.47928e-174	VZ
Lims1	3.53718e-130	0.290633	0.388	0.211	8.32334e-126	VZ
Igdcc3	5.91009e-69	0.290558	0.301	0.185	1.3907e-64	VZ
Hk2	2.27257e-195	0.29047	0.185	0.041	5.34757e-191	VZ
Mis18bp1	5.58622e-89	0.290334	0.406	0.248	1.31449e-84	VZ
Snrnp48	3.17336e-112	0.290214	0.484	0.303	7.46724e-108	VZ
E2f8	3.16279e-154	0.290185	0.224	0.079	7.44236e-150	VZ
Fam120a	4.74747e-126	0.289964	0.388	0.211	1.11713e-121	VZ
Pycr2	4.94603e-134	0.289882	0.394	0.212	1.16385e-129	VZ
Efnb1	5.77708e-65	0.289746	0.709	0.573	1.3594e-60	VZ
Naxd	2.99048e-169	0.28952	0.328	0.141	7.0369e-165	VZ
Cep57	7.07745e-101	0.289367	0.526	0.352	1.66539e-96	VZ
Megf10	6.56729e-227	0.289291	0.144	0.013	1.54535e-222	VZ
Hnrnpr	5.14617e-128	0.289005	0.92	0.852	1.21094e-123	VZ
Brca1	5.25366e-155	0.288817	0.258	0.101	1.23624e-150	VZ
Phactr2	9.95924e-213	0.288563	0.177	0.032	2.34351e-208	VZ
Xpot	7.69429e-174	0.288165	0.272	0.102	1.81054e-169	VZ
Zfp800	5.35789e-143	0.288004	0.297	0.133	1.26077e-138	VZ
1500011K16Rik	1.88803e-150	0.287883	0.316	0.141	4.44272e-146	VZ
Asah1	3.14877e-145	0.287737	0.35	0.17	7.40938e-141	VZ
Mlc1	8.57512e-212	0.287558	0.142	0.016	2.01781e-207	VZ
Rab28	1.95065e-93	0.287375	0.502	0.336	4.59008e-89	VZ
Cisd2	3.76475e-99	0.287304	0.688	0.513	8.85883e-95	VZ
Chpt1	2.04794e-164	0.287091	0.238	0.084	4.819e-160	VZ
Hdgf	3.27951e-143	0.286958	0.945	0.848	7.71702e-139	VZ
Suz12	1.36714e-104	0.286837	0.684	0.496	3.21702e-100	VZ
Rangap1	4.65959e-86	0.286809	0.651	0.489	1.09645e-81	VZ
Snrpd1	1.1485e-158	0.286537	0.951	0.893	2.70253e-154	VZ
Enkd1	7.29851e-193	0.28652	0.2	0.05	1.71741e-188	VZ
Tcf3	8.12566e-109	0.286282	0.84	0.662	1.91205e-104	VZ
Cetn2	2.14453e-118	0.285401	0.414	0.237	5.04629e-114	VZ
Fkbp9	5.04127e-233	0.284945	0.167	0.022	1.18626e-228	VZ
Gfer	1.15968e-127	0.284927	0.411	0.23	2.72884e-123	VZ
Erbin	3.01446e-170	0.284887	0.273	0.104	7.09332e-166	VZ
Lman1	3.65536e-131	0.284542	0.342	0.172	8.60143e-127	VZ
Dpy30	2.92775e-104	0.284513	0.757	0.596	6.88929e-100	VZ
Rbl1	1.2116e-142	0.284236	0.293	0.133	2.85102e-138	VZ
Cntnap2	3.74053e-99	0.283992	0.165	0.062	8.80184e-95	VZ
Pola1	3.8766e-133	0.283947	0.325	0.16	9.12204e-129	VZ
E130114P18Rik	1.8314e-151	0.28377	0.183	0.055	4.30946e-147	VZ
Hnrnpa2b1	5.63151e-172	0.28368	0.986	0.966	1.32515e-167	VZ
Cdc14a	1.14927e-157	0.283646	0.238	0.086	2.70435e-153	VZ
Srsf5	2.18246e-110	0.283577	0.902	0.807	5.13556e-106	VZ
Nr2f6	1.74154e-131	0.283337	0.298	0.139	4.09801e-127	VZ
Polr2f	8.61252e-92	0.283321	0.78	0.665	2.02661e-87	VZ
Cst3	4.06876e-61	0.282998	0.743	0.635	9.57419e-57	VZ
Cdc6	8.3668e-138	0.282992	0.207	0.074	1.96879e-133	VZ
Slc16a1	1.08158e-230	0.282694	0.174	0.026	2.54506e-226	VZ
Sclt1	2.33005e-116	0.282527	0.376	0.21	5.48283e-112	VZ
Fam204a	1.0139e-105	0.282295	0.527	0.343	2.3858e-101	VZ
Rfc5	6.01648e-123	0.282074	0.405	0.229	1.41574e-118	VZ
Rheb	1.43073e-99	0.281987	0.807	0.664	3.36666e-95	VZ
Ncaph	2.73615e-129	0.281786	0.335	0.171	6.43845e-125	VZ
Atic	1.37833e-178	0.28178	0.246	0.083	3.24336e-174	VZ
Hint1	1.04584e-217	0.28144	0.986	0.973	2.46097e-213	VZ
Msh2	1.07709e-113	0.281261	0.423	0.249	2.5345e-109	VZ
Gsta4	3.83065e-207	0.280923	0.173	0.032	9.01389e-203	VZ
Nuf2	8.37131e-122	0.280897	0.365	0.196	1.96985e-117	VZ
Sox5	1.19763e-142	0.280657	0.54	0.316	2.81813e-138	VZ
Mia2	4.89114e-175	0.280454	0.242	0.081	1.15093e-170	VZ
Nup37	9.50028e-132	0.280419	0.323	0.16	2.23551e-127	VZ
Tmed5	4.3136e-120	0.280223	0.354	0.188	1.01503e-115	VZ
Tmed2	1.10001e-96	0.279974	0.821	0.687	2.58843e-92	VZ
Mfsd14a	4.61124e-199	0.279823	0.226	0.064	1.08507e-194	VZ
Baz1b	7.5298e-97	0.279015	0.813	0.671	1.77184e-92	VZ
Naa15	5.74737e-101	0.278467	0.658	0.477	1.35241e-96	VZ
Faap20	2.63944e-177	0.278164	0.272	0.099	6.21088e-173	VZ
Bora	4.86129e-141	0.278061	0.232	0.091	1.14391e-136	VZ
Ldlr	4.22138e-175	0.277838	0.191	0.05	9.93334e-171	VZ
Rap1a	1.97693e-99	0.277722	0.58	0.403	4.6519e-95	VZ
Ddit4l	1.54245e-211	0.277645	0.152	0.02	3.62955e-207	VZ
Nusap1	1.12679e-87	0.277333	0.456	0.289	2.65145e-83	VZ
Cd81	3.73039e-88	0.277255	0.619	0.456	8.77798e-84	VZ
Mthfd1	1.53517e-194	0.277154	0.222	0.062	3.61241e-190	VZ
Eif4h	7.18906e-110	0.277148	0.837	0.711	1.69166e-105	VZ
1810058I24Rik	1.62486e-92	0.277144	0.636	0.461	3.82345e-88	VZ
Fermt2	1.06627e-128	0.276866	0.404	0.22	2.50905e-124	VZ
Wdhd1	3.94873e-127	0.276861	0.287	0.134	9.29176e-123	VZ
Dcp2	4.84531e-123	0.276381	0.368	0.196	1.14015e-118	VZ
Fam3c	4.78116e-164	0.276229	0.254	0.093	1.12505e-159	VZ
Cbx3	1.49283e-145	0.275973	0.982	0.936	3.51278e-141	VZ
Polr1d	7.09509e-96	0.27597	0.792	0.651	1.66955e-91	VZ
Enc1	8.46205e-141	0.275878	0.523	0.302	1.99121e-136	VZ
Rrp1b	2.03803e-137	0.275776	0.313	0.146	4.79569e-133	VZ
Pole4	1.42863e-95	0.275723	0.484	0.315	3.36171e-91	VZ
Sall1	2.13795e-98	0.275485	0.314	0.173	5.03082e-94	VZ
Ints11	8.13738e-169	0.275355	0.279	0.108	1.91481e-164	VZ
Gpsm2	4.2738e-120	0.275207	0.335	0.174	1.00567e-115	VZ
Gm35040	3.59486e-166	0.275152	0.237	0.082	8.45907e-162	VZ
Atf1	2.61355e-117	0.275117	0.377	0.207	6.14994e-113	VZ
Rad54l	3.85051e-130	0.274754	0.323	0.16	9.06063e-126	VZ
Sox2	5.80996e-127	0.274205	0.965	0.832	1.36714e-122	VZ
Eef1g	2.05141e-155	0.274185	0.961	0.935	4.82718e-151	VZ
Pkig	2.51178e-91	0.273806	0.74	0.577	5.91047e-87	VZ
Nuak2	2.27959e-150	0.273552	0.236	0.088	5.3641e-146	VZ
Tanc1	1.43547e-184	0.273497	0.171	0.037	3.3778e-180	VZ
Fam53a	1.46121e-123	0.273496	0.338	0.172	3.43836e-119	VZ
Emsy	3.42465e-144	0.273138	0.344	0.163	8.05853e-140	VZ
Ctbp2	7.94957e-104	0.27311	0.546	0.362	1.87061e-99	VZ
Tspan12	2.11816e-137	0.272767	0.261	0.11	4.98425e-133	VZ
Pnn	2.4513e-103	0.272451	0.918	0.835	5.76815e-99	VZ
Lpcat1	1.80914e-109	0.272339	0.345	0.186	4.2571e-105	VZ
Stard4	2.45064e-165	0.272333	0.215	0.068	5.7666e-161	VZ
Pvrl3	1.04248e-63	0.272217	0.16	0.08	2.45306e-59	VZ
Nudcd1	6.9221e-153	0.271873	0.286	0.12	1.62884e-148	VZ
Naf1	5.60304e-176	0.271055	0.221	0.068	1.31845e-171	VZ
Itgb1	7.87514e-97	0.270806	0.51	0.332	1.8531e-92	VZ
Acsbg1	1.50264e-228	0.270508	0.166	0.023	3.53586e-224	VZ
Cggbp1	5.41202e-92	0.270154	0.628	0.453	1.2735e-87	VZ
Lipg	1.19803e-144	0.269769	0.158	0.042	2.81909e-140	VZ
Fat4	1.62365e-123	0.269454	0.206	0.08	3.82062e-119	VZ
Lpl	7.43137e-185	0.269137	0.158	0.03	1.74868e-180	VZ
Fam92a	1.18952e-88	0.269054	0.674	0.51	2.79906e-84	VZ
Nbdy	9.15957e-178	0.268987	0.213	0.063	2.15534e-173	VZ
Rps16	1.30824e-241	0.268793	0.995	0.991	3.07841e-237	VZ
Pold1	3.31932e-145	0.268283	0.266	0.111	7.81069e-141	VZ
Polr3h	3.92522e-119	0.268179	0.312	0.156	9.23643e-115	VZ
Suv39h2	7.28091e-114	0.268111	0.375	0.21	1.71327e-109	VZ
Rps28	4.24161e-163	0.267549	0.977	0.947	9.98093e-159	VZ
Ppm1g	9.12547e-88	0.267398	0.687	0.535	2.14731e-83	VZ
Mrps14	1.12165e-100	0.266877	0.82	0.682	2.63936e-96	VZ
Ube2d3	6.60029e-126	0.266633	0.94	0.858	1.55311e-121	VZ
Hddc2	1.45221e-146	0.266336	0.288	0.123	3.41719e-142	VZ
Immt	2.56406e-92	0.26629	0.639	0.472	6.03349e-88	VZ
Nim1k	3.68203e-161	0.266286	0.152	0.033	8.66418e-157	VZ
Napepld	3.95962e-184	0.265499	0.178	0.041	9.31738e-180	VZ
Bcl2	2.09873e-96	0.265433	0.26	0.13	4.93852e-92	VZ
Sumo3	9.3235e-86	0.265276	0.759	0.608	2.19391e-81	VZ
Nop53	9.68245e-156	0.265246	0.335	0.15	2.27838e-151	VZ
Tra2b	4.58263e-107	0.265079	0.882	0.768	1.07834e-102	VZ
Med25	4.55809e-101	0.26488	0.43	0.263	1.07256e-96	VZ
Tuba1c	1.03103e-106	0.264876	0.19	0.077	2.42612e-102	VZ
Adgrg1	1.00554e-139	0.264826	0.32	0.148	2.36614e-135	VZ
Ppia	9.48729e-184	0.26474	0.994	0.988	2.23245e-179	VZ
Noc2l	1.03077e-104	0.264536	0.42	0.25	2.4255e-100	VZ
Cdh4	1.88115e-92	0.264125	0.212	0.099	4.42654e-88	VZ
Ephb2	8.40894e-82	0.264045	0.51	0.346	1.97871e-77	VZ
Anp32a	4.39368e-110	0.263984	0.904	0.822	1.03388e-105	VZ
Dtx4	4.16186e-176	0.2639	0.164	0.035	9.79326e-172	VZ
Rnf145	3.6126e-97	0.263649	0.403	0.242	8.5008e-93	VZ
Gcat	1.20357e-156	0.263642	0.233	0.083	2.83212e-152	VZ
Srrm1	1.01735e-108	0.263281	0.909	0.818	2.39393e-104	VZ
Rap1b	7.74654e-88	0.263258	0.539	0.37	1.82284e-83	VZ
Chchd7	5.02574e-99	0.263246	0.431	0.265	1.18261e-94	VZ
Fzd2	1.30631e-68	0.263067	0.669	0.522	3.07389e-64	VZ
Rpn1	4.39481e-109	0.262734	0.399	0.23	1.03414e-104	VZ
H2-K1	1.75383e-204	0.262494	0.146	0.019	4.12695e-200	VZ
Lsm3	7.24394e-103	0.262271	0.791	0.625	1.70457e-98	VZ
Rsrc1	7.46227e-94	0.261622	0.527	0.352	1.75595e-89	VZ
Tcea1	3.87025e-84	0.261141	0.576	0.413	9.1071e-80	VZ
Nsd3	1.12413e-140	0.261031	0.323	0.15	2.64519e-136	VZ
Kif22	2.15549e-101	0.260911	0.314	0.17	5.07209e-97	VZ
Bclaf1	1.04888e-104	0.260529	0.883	0.765	2.46811e-100	VZ
H2afx	9.17106e-180	0.260326	0.817	0.581	2.15804e-175	VZ
Rplp2	5.72045e-207	0.260316	0.993	0.986	1.34608e-202	VZ
Marcks	1.48976e-211	0.260183	0.999	0.997	3.50556e-207	VZ
Rcbtb2	2.76967e-103	0.260143	0.504	0.322	6.5173e-99	VZ
Ppib	2.6916e-77	0.259891	0.834	0.753	6.33361e-73	VZ
Tns3	5.58969e-194	0.259845	0.151	0.024	1.31531e-189	VZ
Eri1	5.82057e-103	0.259834	0.388	0.227	1.36964e-98	VZ
Ssb	2.21187e-108	0.259809	0.912	0.847	5.20476e-104	VZ
Ppig	9.54843e-93	0.259689	0.838	0.723	2.24684e-88	VZ
Ddx46	1.45508e-89	0.259488	0.769	0.625	3.42395e-85	VZ
Taf15	8.69929e-85	0.25864	0.707	0.543	2.04703e-80	VZ
Jam2	1.12342e-124	0.25825	0.282	0.131	2.64351e-120	VZ
Rabggtb	3.45065e-106	0.258067	0.367	0.207	8.11972e-102	VZ
Cse1l	1.55607e-104	0.258019	0.444	0.269	3.66158e-100	VZ
Fam136a	2.83198e-84	0.257743	0.504	0.344	6.66394e-80	VZ
Naxe	6.70276e-151	0.257725	0.258	0.101	1.57723e-146	VZ
Rad23b	9.91199e-84	0.257618	0.716	0.553	2.33239e-79	VZ
Cetn3	7.26556e-78	0.257514	0.753	0.631	1.70966e-73	VZ
Fam96a	2.37715e-79	0.257405	0.661	0.499	5.59366e-75	VZ
Mrto4	4.71981e-86	0.257347	0.566	0.399	1.11062e-81	VZ
Ckap5	2.08891e-62	0.257146	0.675	0.539	4.91541e-58	VZ
Cep290	4.63526e-93	0.256986	0.384	0.23	1.09072e-88	VZ
Gyg	5.83655e-220	0.256949	0.171	0.027	1.3734e-215	VZ
Uqcr10	1.25461e-94	0.256882	0.86	0.745	2.95222e-90	VZ
Sigmar1	1.1752e-133	0.256395	0.259	0.11	2.76535e-129	VZ
Igf2bp2	2.99879e-77	0.256355	0.448	0.298	7.05645e-73	VZ
Mettl26	5.94696e-168	0.256315	0.234	0.078	1.39938e-163	VZ
Nedd4	8.52187e-167	0.256045	0.988	0.97	2.00528e-162	VZ
Rpn2	8.56899e-83	0.256013	0.523	0.362	2.01637e-78	VZ
Mcm10	8.56432e-131	0.255951	0.247	0.104	2.01527e-126	VZ
Med21	5.24446e-90	0.255789	0.491	0.326	1.23407e-85	VZ
Krtcap2	7.08087e-77	0.255524	0.698	0.552	1.6662e-72	VZ
Cmss1	1.60937e-173	0.255138	0.227	0.073	3.78701e-169	VZ
Thyn1	2.63111e-104	0.254865	0.431	0.26	6.19126e-100	VZ
Sdhd	1.67138e-90	0.254449	0.508	0.341	3.93292e-86	VZ
Ptgfrn	7.47632e-154	0.254434	0.155	0.037	1.75925e-149	VZ
Sipa1l1	9.14031e-120	0.254433	0.293	0.142	2.15081e-115	VZ
Ugdh	1.71362e-67	0.25436	0.442	0.305	4.03231e-63	VZ
Virma	6.80882e-151	0.254296	0.268	0.107	1.60218e-146	VZ
Zdhhc6	5.49219e-119	0.25409	0.322	0.162	1.29237e-114	VZ
Ift57	9.03314e-132	0.253942	0.261	0.111	2.12559e-127	VZ
Utp18	1.10936e-98	0.253924	0.39	0.23	2.61044e-94	VZ
Ybx1	7.39098e-211	0.253863	0.999	0.997	1.73917e-206	VZ
9130401M01Rik	1.32493e-97	0.253579	0.381	0.222	3.1177e-93	VZ
Rad18	8.40969e-124	0.253555	0.246	0.107	1.97888e-119	VZ
Prkar2a	6.3205e-76	0.253317	0.494	0.343	1.48728e-71	VZ
Sec61b	8.45731e-95	0.252862	0.891	0.796	1.99009e-90	VZ
Arglu1	2.86367e-103	0.252728	0.938	0.873	6.7385e-99	VZ
Ankrd49	2.47692e-127	0.252717	0.293	0.137	5.82844e-123	VZ
Yae1d1	2.20091e-81	0.252355	0.601	0.436	5.17895e-77	VZ
Dlgap5	2.78798e-99	0.252336	0.309	0.167	6.5604e-95	VZ
Tns1	2.36797e-187	0.252325	0.125	0.013	5.57208e-183	VZ
Epb41l5	1.05285e-170	0.25212	0.2	0.057	2.47747e-166	VZ
Nsmce3	6.4612e-163	0.251977	0.226	0.076	1.52038e-158	VZ
Wdr77	2.94773e-104	0.251712	0.368	0.207	6.9363e-100	VZ
Prmt3	1.72029e-148	0.251586	0.251	0.097	4.04801e-144	VZ
Lhfp	3.57804e-145	0.250972	0.183	0.055	8.41948e-141	VZ
Nek7	3.36868e-141	0.25082	0.222	0.082	7.92685e-137	VZ
Prmt5	1.14374e-95	0.250812	0.419	0.256	2.69133e-91	VZ
Prpf19	1.37002e-84	0.250453	0.636	0.475	3.22379e-80	VZ
Tma16	3.21508e-121	0.250439	0.292	0.138	7.5654e-117	VZ
Tpr	2.83372e-88	0.250337	0.887	0.797	6.66802e-84	VZ
Smim11	2.0532e-76	0.250196	0.596	0.433	4.83137e-72	VZ
Pfkl	8.78105e-95	0.250191	0.332	0.187	2.06627e-90	VZ
1500009L16Rik	1.33233e-97	0.250067	0.375	0.22	3.13511e-93	VZ
Cyb5b	1.24804e-92	0.250064	0.426	0.265	2.93677e-88	VZ
Gm11627	6.44774e-149	0.250036	0.134	0.027	1.51722e-144	VZ
Abracl	0	1.66912	0.971	0.766	0	SVZ
Dlx6os1	0	1.60046	0.935	0.341	0	SVZ
Mpped2	0	1.60001	0.893	0.513	0	SVZ
Sp9	0	1.3171	0.891	0.368	0	SVZ
Nudt4	0	1.29634	0.843	0.54	0	SVZ
Ccnd2	0	1.27322	1	0.685	0	SVZ
RP23-145L9.6	0	1.11243	0.556	0.188	0	SVZ
Elavl4	0	1.06997	0.815	0.429	0	SVZ
Dlx5	0	1.0319	0.823	0.296	0	SVZ
Dlx1	0	1.01539	0.948	0.616	0	SVZ
St18	0	0.951795	0.399	0.078	0	SVZ
Gm13889	0	0.948081	0.672	0.294	0	SVZ
Dcx	0	0.932147	1	0.384	0	SVZ
Pbx1	0	0.904214	0.935	0.867	0	SVZ
Dlx2	0	0.901503	0.955	0.675	0	SVZ
Plxna2	0	0.886929	0.86	0.512	0	SVZ
Pfn2	0	0.884333	0.973	0.868	0	SVZ
Arx	0	0.87837	0.871	0.493	0	SVZ
Sox11	0	0.873619	1	0.997	0	SVZ
Slc18a2	0	0.873467	0.464	0.137	0	SVZ
Nrxn3	0	0.86403	0.927	0.415	0	SVZ
Phf21b	0	0.853692	0.748	0.357	0	SVZ
Gad2	0	0.849428	0.851	0.35	0	SVZ
Insm1	0	0.845716	0.795	0.439	0	SVZ
Lhx8	6.01198e-149	0.839105	0.179	0.056	1.41468e-144	SVZ
Dclk2	0	0.83101	0.755	0.41	0	SVZ
2810417H13Rik	1.80565e-157	0.827469	0.429	0.243	4.24887e-153	SVZ
Shfm1	3.88156e-226	0.824555	0.62	0.434	9.13371e-222	SVZ
Tmem2	0	0.820507	0.588	0.293	0	SVZ
Cd24a	0	0.816379	0.976	0.8	0	SVZ
2700060E02Rik	9.94493e-246	0.814692	0.605	0.403	2.34014e-241	SVZ
Pou3f4	1.65419e-305	0.775232	0.61	0.377	3.89246e-301	SVZ
Myt1	0	0.768318	0.562	0.197	0	SVZ
Ube2c	1.82955e-117	0.766795	0.653	0.498	4.3051e-113	SVZ
Rnd3	0	0.728181	0.835	0.604	0	SVZ
4930506M07Rik	6.01969e-263	0.708177	0.284	0.089	1.41649e-258	SVZ
Ccdc88a	0	0.701119	0.948	0.838	0	SVZ
Sox4	0	0.693401	0.999	0.984	0	SVZ
Raph1	1.55006e-291	0.684925	0.703	0.487	3.64745e-287	SVZ
Flrt2	6.31506e-117	0.678998	0.338	0.204	1.486e-112	SVZ
Elavl3	0	0.678175	0.978	0.827	0	SVZ
Ccng2	0	0.676764	0.641	0.376	0	SVZ
Cited2	0	0.669018	0.776	0.463	0	SVZ
Grik3	0	0.662704	0.453	0.135	0	SVZ
Ezr	3.13384e-250	0.660425	0.624	0.413	7.37424e-246	SVZ
Hmgn2	0	0.655131	0.941	0.861	0	SVZ
Mfng	0	0.650125	0.717	0.442	0	SVZ
Tagln3	0	0.64654	0.791	0.436	0	SVZ
Nefm	5.92145e-180	0.637346	0.323	0.146	1.39338e-175	SVZ
Cdca7	0	0.635044	0.81	0.606	0	SVZ
Top2b	0	0.62592	0.942	0.841	0	SVZ
Ube2ql1	1.13697e-300	0.622452	0.382	0.141	2.67541e-296	SVZ
Dpysl3	0	0.61777	0.922	0.624	0	SVZ
Igfbpl1	0	0.617516	0.814	0.396	0	SVZ
Prox1	0	0.609345	0.405	0.147	0	SVZ
Ubald2	1.13812e-239	0.607498	0.772	0.612	2.6781e-235	SVZ
2700094K13Rik	1.20358e-136	0.598842	0.575	0.398	2.83215e-132	SVZ
Lhx6	4.67756e-160	0.595959	0.311	0.142	1.10068e-155	SVZ
Gm4258	5.14167e-194	0.592769	0.423	0.218	1.20989e-189	SVZ
Tmem123	2.08102e-212	0.592484	0.458	0.261	4.89684e-208	SVZ
Sp8	0	0.591853	0.268	0.061	0	SVZ
Zfhx3	1.36282e-165	0.591176	0.488	0.296	3.20686e-161	SVZ
Aes	0	0.588885	0.965	0.868	0	SVZ
Myo1b	7.79212e-302	0.588136	0.719	0.477	1.83356e-297	SVZ
Bcl11b	0	0.581097	0.911	0.592	0	SVZ
A930011O12Rik	2.50094e-243	0.577384	0.416	0.178	5.88495e-239	SVZ
Epha4	1.47624e-174	0.576228	0.836	0.743	3.47375e-170	SVZ
Wbp5	5.82615e-152	0.573134	0.57	0.391	1.37095e-147	SVZ
Hn1	7.94092e-138	0.570558	0.631	0.467	1.86858e-133	SVZ
Gse1	5.71913e-274	0.565383	0.676	0.424	1.34577e-269	SVZ
Ube2s	3.29023e-209	0.563882	0.942	0.905	7.74223e-205	SVZ
Carhsp1	1.5005e-304	0.560816	0.768	0.528	3.53084e-300	SVZ
Hist1h2ap	1.41764e-52	0.554319	0.358	0.268	3.33584e-48	SVZ
Cyth2	0	0.553346	0.8	0.572	0	SVZ
Nkx2-1	1.72605e-17	0.549312	0.375	0.362	4.06156e-13	SVZ
Arl4d	0	0.547929	0.385	0.109	0	SVZ
Dlx6	0	0.54265	0.462	0.172	0	SVZ
Stmn1	0	0.540437	0.998	0.995	0	SVZ
Meis2	3.83149e-25	0.533301	0.753	0.799	9.01587e-21	SVZ
Nav1	2.98727e-258	0.532738	0.644	0.381	7.02934e-254	SVZ
Pou3f1	6.12051e-175	0.526286	0.419	0.218	1.44022e-170	SVZ
Nrep	1.53376e-237	0.513229	0.811	0.606	3.60908e-233	SVZ
Zswim5	3.76115e-201	0.5125	0.403	0.201	8.85035e-197	SVZ
H3f3b	0	0.507065	1	0.999	0	SVZ
Nol4	2.43115e-241	0.506454	0.374	0.152	5.72074e-237	SVZ
Ppp1r14b	0	0.506317	0.996	0.984	0	SVZ
Gnb2l1	6.85945e-121	0.504273	0.63	0.47	1.6141e-116	SVZ
Nlk	1.7446e-209	0.502331	0.587	0.377	4.10521e-205	SVZ
Scrt1	2.54343e-283	0.502167	0.469	0.195	5.98495e-279	SVZ
Shb	1.13855e-292	0.501219	0.483	0.21	2.67912e-288	SVZ
Scrt2	0	0.500764	0.402	0.141	0	SVZ
Gucy1a3	7.30175e-185	0.498106	0.198	0.056	1.71817e-180	SVZ
H3f3a	0	0.49734	1	0.999	0	SVZ
Mex3a	1.56894e-292	0.496554	0.927	0.835	3.69186e-288	SVZ
Srrm4	3.49571e-280	0.495484	0.583	0.297	8.22576e-276	SVZ
Pak3	1.37071e-66	0.492132	0.632	0.546	3.22542e-62	SVZ
Trp53i11	1.61114e-234	0.491057	0.605	0.348	3.79118e-230	SVZ
Zeb2	1.00323e-276	0.49071	0.893	0.743	2.36069e-272	SVZ
Nav2	2.20362e-216	0.488054	0.212	0.057	5.18533e-212	SVZ
Mir124a-1hg	1.50745e-174	0.481782	0.239	0.087	3.54718e-170	SVZ
2700081O15Rik	9.84413e-232	0.479262	0.766	0.574	2.31642e-227	SVZ
Kdm6b	1.99614e-227	0.47863	0.756	0.545	4.69711e-223	SVZ
D930015E06Rik	4.161e-150	0.47697	0.469	0.277	9.79124e-146	SVZ
H2afv	7.99661e-280	0.476419	0.994	0.97	1.88168e-275	SVZ
Foxg1	1.11828e-260	0.474831	0.946	0.876	2.63143e-256	SVZ
Zswim6	1.95683e-143	0.472892	0.344	0.173	4.60462e-139	SVZ
Lmo4	7.20642e-77	0.471459	0.723	0.674	1.69574e-72	SVZ
mt-Rnr1	7.62349e-104	0.470905	0.629	0.47	1.79388e-99	SVZ
Cbfa2t3	7.63058e-217	0.469987	0.434	0.201	1.79555e-212	SVZ
mt-Rnr2	6.71082e-92	0.46842	0.635	0.481	1.57912e-87	SVZ
Fbrsl1	2.01996e-191	0.461861	0.66	0.466	4.75317e-187	SVZ
Top2a	7.96296e-31	0.461004	0.599	0.567	1.87376e-26	SVZ
Meis1	8.75535e-174	0.45673	0.429	0.238	2.06022e-169	SVZ
Ttc9b	1.45808e-188	0.45629	0.651	0.452	3.43101e-184	SVZ
Csnk1e	0	0.454022	0.964	0.887	0	SVZ
Ppdpf	4.62793e-231	0.452888	0.93	0.85	1.089e-226	SVZ
Dleu2	1.31002e-149	0.451534	0.426	0.235	3.0826e-145	SVZ
Soga3	1.03087e-267	0.450852	0.762	0.5	2.42573e-263	SVZ
Cdkn1c	1.55716e-93	0.45071	0.414	0.265	3.66415e-89	SVZ
Mir124-2hg	3.58897e-162	0.444779	0.751	0.601	8.4452e-158	SVZ
Cdkn2d	1.5122e-119	0.444659	0.485	0.337	3.55836e-115	SVZ
Map1a	5.2289e-159	0.441612	0.556	0.364	1.23041e-154	SVZ
Rffl	1.47292e-221	0.440273	0.337	0.138	3.46593e-217	SVZ
Pnrc1	3.36133e-179	0.43512	0.723	0.552	7.90955e-175	SVZ
Wbp1	3.04522e-197	0.433524	0.722	0.524	7.16571e-193	SVZ
Fscn1	4.82475e-204	0.433042	0.881	0.779	1.13531e-199	SVZ
Dll3	1.09735e-165	0.432349	0.403	0.213	2.58216e-161	SVZ
Midn	1.52603e-197	0.42844	0.818	0.667	3.59089e-193	SVZ
Slc32a1	3.14536e-272	0.428314	0.515	0.223	7.40135e-268	SVZ
Mex3d	3.49528e-165	0.425666	0.634	0.457	8.22474e-161	SVZ
Rnd2	1.10907e-144	0.424103	0.437	0.261	2.60975e-140	SVZ
H1f0	7.58385e-91	0.424077	0.86	0.795	1.78456e-86	SVZ
Lgals1	8.08694e-178	0.423967	0.302	0.13	1.90294e-173	SVZ
Cd1d1	2.172e-215	0.423585	0.381	0.169	5.11092e-211	SVZ
Ebpl	7.67758e-146	0.422166	0.463	0.288	1.80661e-141	SVZ
Peli1	2.51241e-192	0.421987	0.806	0.661	5.91196e-188	SVZ
Gad1	8.59352e-212	0.421738	0.388	0.162	2.02214e-207	SVZ
Btg1	1.30425e-156	0.420963	0.785	0.64	3.06903e-152	SVZ
Rundc3a	8.95004e-203	0.41976	0.62	0.38	2.10603e-198	SVZ
Rnf5	2.04021e-155	0.419129	0.65	0.49	4.80082e-151	SVZ
Erh	2.76362e-104	0.414847	0.8	0.735	6.50307e-100	SVZ
Mex3b	1.82658e-167	0.408211	0.701	0.522	4.29813e-163	SVZ
2310036O22Rik	2.7777e-103	0.407522	0.563	0.402	6.53619e-99	SVZ
Gm26735	8.2389e-146	0.406411	0.623	0.448	1.93869e-141	SVZ
E130006D01Rik	2.75519e-214	0.403918	0.274	0.096	6.48325e-210	SVZ
Fam64a	1.64076e-87	0.402961	0.269	0.147	3.86086e-83	SVZ
Pbrm1	1.82464e-207	0.401062	0.931	0.877	4.29356e-203	SVZ
Gm14964	3.13956e-221	0.400398	0.294	0.104	7.3877e-217	SVZ
Rpl13a	9.43143e-175	0.39855	0.97	0.938	2.21931e-170	SVZ
Hnrnpab	0	0.398492	0.995	0.984	0	SVZ
Enox1	5.71971e-184	0.397913	0.363	0.169	1.3459e-179	SVZ
Paip2	8.2775e-207	0.396985	0.93	0.864	1.94778e-202	SVZ
Cenpe	5.93128e-31	0.395253	0.47	0.412	1.39569e-26	SVZ
Ola1	3.85944e-126	0.393936	0.73	0.609	9.08164e-122	SVZ
Sgol2	1.71928e-114	0.393773	0.22	0.095	4.04564e-110	SVZ
Ago1	3.92557e-147	0.393558	0.614	0.446	9.23725e-143	SVZ
Tubb3	0	0.392272	0.953	0.745	0	SVZ
Etv1	8.16717e-92	0.390058	0.271	0.152	1.92182e-87	SVZ
RP23-393I12.1	2.59751e-135	0.389426	0.264	0.118	6.1122e-131	SVZ
Tulp4	3.78626e-177	0.388674	0.815	0.662	8.90944e-173	SVZ
Crabp2	3.58244e-79	0.382726	0.4	0.276	8.42983e-75	SVZ
Dync1i2	1.72821e-173	0.379899	0.862	0.758	4.06665e-169	SVZ
Zfp532	5.08456e-148	0.376981	0.44	0.258	1.19645e-143	SVZ
Stk32c	1.38023e-219	0.375115	0.27	0.09	3.24781e-215	SVZ
Stmn2	1.00901e-218	0.374384	0.638	0.354	2.37431e-214	SVZ
Tceb2	1.74656e-85	0.372058	0.617	0.457	4.10982e-81	SVZ
H2afx	2.85405e-06	0.371435	0.671	0.713	0.0671587	SVZ
3110039M20Rik	7.58736e-106	0.369757	0.54	0.393	1.78538e-101	SVZ
Cenpa	7.23058e-21	0.368237	0.561	0.522	1.70143e-16	SVZ
Gm14204	1.43336e-156	0.368007	0.41	0.2	3.37283e-152	SVZ
Tmsb4x	1.95514e-275	0.366621	1	1	4.60064e-271	SVZ
Dlx6os2	5.44084e-221	0.359811	0.196	0.045	1.28028e-216	SVZ
RP23-393I12.4	3.06389e-135	0.357366	0.247	0.105	7.20964e-131	SVZ
Numa1	1.23653e-118	0.353145	0.566	0.409	2.90967e-114	SVZ
Marcksl1	1.34069e-303	0.353094	0.998	0.994	3.15478e-299	SVZ
Ftl1	0	0.350985	1	0.999	0	SVZ
Bcl11a	2.71844e-208	0.350886	0.831	0.669	6.39676e-204	SVZ
Map2	1.83121e-195	0.349833	0.872	0.691	4.30903e-191	SVZ
Parp6	5.18243e-165	0.349406	0.449	0.237	1.21948e-160	SVZ
Ptprs	7.27764e-144	0.346838	0.884	0.802	1.7125e-139	SVZ
Map4k4	6.77259e-186	0.346638	0.969	0.908	1.59366e-181	SVZ
Fam96b	1.58507e-127	0.346565	0.627	0.475	3.72984e-123	SVZ
Tiam2	1.09578e-212	0.345581	0.172	0.035	2.57847e-208	SVZ
Ypel3	1.99129e-115	0.345156	0.566	0.395	4.6857e-111	SVZ
Stk33	2.15884e-144	0.344748	0.276	0.125	5.07997e-140	SVZ
Pik3r3	4.28408e-135	0.34468	0.379	0.208	1.00809e-130	SVZ
Rnasel	7.69454e-149	0.343674	0.342	0.166	1.8106e-144	SVZ
Arhgef2	4.19817e-135	0.342645	0.482	0.298	9.87871e-131	SVZ
Rufy3	1.21472e-155	0.341933	0.747	0.565	2.85836e-151	SVZ
4930402H24Rik	7.11916e-131	0.341829	0.537	0.347	1.67521e-126	SVZ
Tsg101	9.81993e-150	0.340869	0.875	0.787	2.31073e-145	SVZ
Celf3	7.68459e-166	0.340018	0.566	0.329	1.80826e-161	SVZ
Trp53inp2	2.76844e-153	0.339235	0.344	0.166	6.51441e-149	SVZ
Prdx2	3.03494e-170	0.337752	0.986	0.969	7.14151e-166	SVZ
Cdk4	3.1464e-263	0.336591	0.992	0.978	7.4038e-259	SVZ
Whsc1	1.22246e-73	0.334605	0.513	0.369	2.87656e-69	SVZ
Elavl2	5.40363e-134	0.332834	0.792	0.657	1.27153e-129	SVZ
Esrrg	2.2714e-176	0.329662	0.176	0.047	5.34483e-172	SVZ
Efs	2.35254e-137	0.329539	0.28	0.131	5.53577e-133	SVZ
Pbx3	2.35433e-61	0.327416	0.527	0.444	5.53997e-57	SVZ
Slc6a1	3.96362e-105	0.326242	0.497	0.338	9.32678e-101	SVZ
Btf3l4	1.97197e-85	0.32437	0.623	0.494	4.64023e-81	SVZ
Celf4	1.19663e-209	0.321388	0.702	0.438	2.81578e-205	SVZ
Cox7a2	2.53151e-173	0.320597	0.968	0.938	5.9569e-169	SVZ
Scg3	7.70774e-121	0.318882	0.555	0.38	1.81371e-116	SVZ
Ckap2l	7.0723e-49	0.318745	0.375	0.284	1.66418e-44	SVZ
Wbp2	1.11269e-97	0.317475	0.489	0.345	2.61827e-93	SVZ
Birc5	1.70944e-22	0.316539	0.543	0.519	4.02248e-18	SVZ
Tpm4	6.41992e-78	0.315468	0.736	0.633	1.51067e-73	SVZ
Ncapd2	2.5958e-49	0.315353	0.523	0.455	6.10817e-45	SVZ
Cald1	2.98716e-63	0.313297	0.512	0.403	7.02909e-59	SVZ
Fam222a	4.07251e-107	0.312375	0.353	0.202	9.58303e-103	SVZ
Smc2	3.66596e-18	0.31179	0.632	0.647	8.62638e-14	SVZ
Rcor2	1.31141e-98	0.311544	0.698	0.562	3.08588e-94	SVZ
Ccni	1.44691e-112	0.311452	0.785	0.671	3.40473e-108	SVZ
Metap1d	5.6878e-83	0.310577	0.468	0.333	1.3384e-78	SVZ
Hmgb3	3.00839e-166	0.310399	0.985	0.976	7.07905e-162	SVZ
Traf4	2.15423e-106	0.308984	0.65	0.482	5.06913e-102	SVZ
Atpif1	1.35124e-183	0.307746	0.98	0.958	3.1796e-179	SVZ
Ddah2	1.584e-110	0.305417	0.899	0.837	3.72731e-106	SVZ
Jund	1.11067e-129	0.305005	0.956	0.922	2.61353e-125	SVZ
Dctn3	6.06785e-111	0.304025	0.765	0.645	1.42783e-106	SVZ
Apc2	5.36443e-124	0.303662	0.491	0.297	1.2623e-119	SVZ
Bcl7a	1.22066e-92	0.302644	0.75	0.644	2.87233e-88	SVZ
Nrip1	4.93665e-71	0.302555	0.415	0.3	1.16164e-66	SVZ
Dynll1	8.10927e-117	0.302357	0.984	0.973	1.90819e-112	SVZ
RP23-393I12.3	5.53841e-114	0.302189	0.214	0.09	1.30324e-109	SVZ
Lmo3	1.23889e-127	0.30212	0.39	0.217	2.91523e-123	SVZ
Zfp516	7.59792e-70	0.301755	0.432	0.315	1.78787e-65	SVZ
Kdm1a	3.35919e-119	0.301558	0.872	0.792	7.9045e-115	SVZ
Basp1	4.80539e-259	0.301433	0.997	0.985	1.13076e-254	SVZ
Gabarapl2	1.07498e-128	0.300796	0.902	0.841	2.52954e-124	SVZ
Xist	8.90147e-67	0.300619	0.771	0.698	2.0946e-62	SVZ
Dda1	6.17879e-98	0.299644	0.644	0.509	1.45393e-93	SVZ
Ube2r2	8.37456e-116	0.299091	0.909	0.853	1.97062e-111	SVZ
Kdm7a	4.09945e-107	0.298802	0.328	0.182	9.64642e-103	SVZ
Tceb1	1.39472e-77	0.298791	0.489	0.34	3.28192e-73	SVZ
Tax1bp3	2.36655e-103	0.297868	0.454	0.295	5.56873e-99	SVZ
Calm2	6.46309e-121	0.297301	0.965	0.937	1.52083e-116	SVZ
Bahcc1	7.61673e-103	0.297237	0.361	0.216	1.79229e-98	SVZ
Rps27rt	2.5385e-69	0.296731	0.616	0.502	5.97336e-65	SVZ
Ube2i	2.21221e-137	0.295842	0.953	0.91	5.20555e-133	SVZ
Hnrnpa1	3.44021e-249	0.294861	0.998	0.995	8.09515e-245	SVZ
Csrp2	1.70765e-66	0.294301	0.668	0.575	4.01828e-62	SVZ
Tet3	1.34711e-91	0.29403	0.636	0.508	3.16989e-87	SVZ
Gng2	2.95991e-121	0.292905	0.762	0.599	6.96497e-117	SVZ
Baz2b	3.31986e-64	0.292583	0.664	0.57	7.81195e-60	SVZ
Miat	7.16156e-60	0.292312	0.718	0.611	1.68519e-55	SVZ
Thap2	1.62717e-72	0.292284	0.456	0.339	3.82889e-68	SVZ
1190002F15Rik	2.29518e-85	0.291457	0.239	0.122	5.40079e-81	SVZ
Arrdc4	2.2283e-113	0.290865	0.219	0.096	5.2434e-109	SVZ
Arid1a	6.18276e-102	0.290359	0.832	0.758	1.45486e-97	SVZ
Slc25a12	9.89681e-104	0.289976	0.318	0.181	2.32882e-99	SVZ
Mrpl34	2.62786e-83	0.289927	0.789	0.709	6.18363e-79	SVZ
Tmsb10	3.19615e-306	0.28919	1	0.992	7.52085e-302	SVZ
Slc25a51	3.29911e-85	0.287759	0.532	0.397	7.76313e-81	SVZ
Efna2	6.79051e-77	0.286608	0.554	0.431	1.59788e-72	SVZ
Cks2	4.5625e-12	0.286081	0.519	0.492	1.0736e-07	SVZ
Mien1	9.99173e-91	0.285727	0.654	0.522	2.35115e-86	SVZ
Celsr3	2.94643e-138	0.28564	0.257	0.108	6.93325e-134	SVZ
Arhgap11a	7.10951e-42	0.284414	0.347	0.264	1.67294e-37	SVZ
Snrpe	1.99222e-145	0.283653	0.982	0.956	4.68789e-141	SVZ
Selk	6.24692e-72	0.28364	0.525	0.37	1.46996e-67	SVZ
Gdpd1	6.12816e-105	0.283309	0.624	0.455	1.44202e-100	SVZ
Tox3	2.64241e-49	0.283167	0.75	0.691	6.21785e-45	SVZ
Foxp4	5.11767e-54	0.28315	0.205	0.121	1.20424e-49	SVZ
Gm27032	6.78291e-46	0.283117	0.36	0.265	1.59609e-41	SVZ
Cox7c	7.44208e-142	0.282823	0.971	0.934	1.7512e-137	SVZ
Akirin2	5.40364e-72	0.282792	0.708	0.631	1.27153e-67	SVZ
Gm2694	4.5701e-143	0.282442	0.195	0.068	1.07539e-138	SVZ
Shtn1	7.69064e-25	0.282414	0.16	0.112	1.80968e-20	SVZ
Myeov2	1.94022e-71	0.281314	0.451	0.308	4.56554e-67	SVZ
Clasp1	7.21109e-85	0.281219	0.639	0.516	1.69684e-80	SVZ
Yam1	4.86559e-69	0.28114	0.55	0.396	1.14492e-64	SVZ
Mllt11	1.22801e-228	0.280899	0.83	0.542	2.88962e-224	SVZ
Akap9	2.44761e-133	0.280651	0.892	0.771	5.75947e-129	SVZ
Zfp503	3.07742e-58	0.280124	0.147	0.071	7.24147e-54	SVZ
Msra	5.469e-102	0.279942	0.281	0.151	1.28691e-97	SVZ
Zcchc14	7.74434e-70	0.27852	0.488	0.365	1.82232e-65	SVZ
Kdm5b	2.63076e-79	0.278333	0.654	0.523	6.19044e-75	SVZ
Chchd2	1.40416e-191	0.278207	0.995	0.987	3.30413e-187	SVZ
Med10	2.83869e-67	0.278054	0.614	0.522	6.67973e-63	SVZ
Hmmr	6.51801e-24	0.277692	0.324	0.263	1.53375e-19	SVZ
Spc25	1.61699e-20	0.276291	0.455	0.414	3.80495e-16	SVZ
Akna	1.78463e-114	0.274715	0.234	0.107	4.19942e-110	SVZ
2610307P16Rik	2.17201e-146	0.274391	0.176	0.054	5.11097e-142	SVZ
Mxi1	3.33993e-66	0.274114	0.499	0.385	7.85919e-62	SVZ
Sbk1	7.38148e-98	0.27091	0.725	0.592	1.73694e-93	SVZ
Acin1	4.51774e-98	0.270837	0.908	0.85	1.06307e-93	SVZ
Sh3bgrl	5.76972e-81	0.270117	0.865	0.814	1.35767e-76	SVZ
Rftn2	5.34961e-101	0.269833	0.217	0.101	1.25882e-96	SVZ
Atp6v0e	1.86582e-70	0.269551	0.512	0.397	4.39047e-66	SVZ
Arl6ip1	1.71167e-05	0.269292	0.728	0.728	0.402774	SVZ
Tpt1	0	0.269199	1	0.999	0	SVZ
Dynlt1f	1.88396e-66	0.268615	0.43	0.319	4.43315e-62	SVZ
Pcgf3	6.89529e-84	0.268459	0.478	0.34	1.62253e-79	SVZ
Casc5	1.18184e-77	0.268452	0.231	0.12	2.78098e-73	SVZ
Bmi1	2.12368e-70	0.267952	0.484	0.364	4.99724e-66	SVZ
Zfand5	5.77139e-89	0.267854	0.805	0.715	1.35806e-84	SVZ
Dlgap4	2.52028e-117	0.267081	0.743	0.571	5.93046e-113	SVZ
Arhgef7	3.75173e-75	0.266812	0.523	0.397	8.82819e-71	SVZ
Ska2	1.38378e-48	0.265279	0.505	0.418	3.25617e-44	SVZ
Klhl13	1.79709e-69	0.264934	0.353	0.241	4.22874e-65	SVZ
Nusap1	2.06321e-22	0.2645	0.409	0.353	4.85494e-18	SVZ
Trim2	1.59498e-66	0.264388	0.723	0.634	3.75315e-62	SVZ
Usmg5	6.03747e-78	0.263856	0.836	0.765	1.42068e-73	SVZ
Ahsa2	4.46009e-65	0.263043	0.63	0.525	1.0495e-60	SVZ
Mxd4	7.28752e-64	0.262957	0.331	0.216	1.71483e-59	SVZ
Sel1l3	2.85655e-115	0.262677	0.185	0.07	6.72174e-111	SVZ
Shd	6.80297e-88	0.262413	0.326	0.193	1.60081e-83	SVZ
Mapk6	4.56172e-67	0.261774	0.56	0.45	1.07342e-62	SVZ
Hnrnph3	5.65351e-84	0.26152	0.851	0.795	1.33033e-79	SVZ
Atcay	1.26558e-101	0.261101	0.325	0.177	2.97804e-97	SVZ
Rere	4.26753e-67	0.260029	0.551	0.436	1.00419e-62	SVZ
Chn1	9.12109e-79	0.259349	0.545	0.411	2.14628e-74	SVZ
Foxp2	1.58862e-61	0.259261	0.237	0.14	3.73817e-57	SVZ
Mtf2	2.11114e-72	0.258971	0.621	0.505	4.96773e-68	SVZ
Limd2	2.56761e-65	0.258363	0.684	0.595	6.04184e-61	SVZ
Gm8186	6.31739e-57	0.258022	0.409	0.299	1.48655e-52	SVZ
Arid4b	1.6808e-84	0.257891	0.829	0.752	3.95509e-80	SVZ
2810428I15Rik	2.22518e-67	0.257809	0.38	0.252	5.23607e-63	SVZ
Dcbld1	2.22057e-58	0.257448	0.261	0.166	5.22522e-54	SVZ
Fam110a	1.42769e-74	0.256105	0.358	0.234	3.35949e-70	SVZ
Nhp2l1	2.8885e-63	0.255712	0.484	0.341	6.79694e-59	SVZ
Chd7	2.1318e-64	0.254524	0.702	0.603	5.01634e-60	SVZ
Arpc5	2.73136e-77	0.252705	0.731	0.625	6.42716e-73	SVZ
4833439L19Rik	1.00666e-61	0.252169	0.604	0.499	2.36878e-57	SVZ
Mxd3	1.29024e-38	0.252011	0.32	0.243	3.03606e-34	SVZ
Dlx1as	1.43763e-131	0.251817	0.224	0.088	3.38289e-127	SVZ
Nin	1.21259e-86	0.251456	0.272	0.15	2.85334e-82	SVZ
Mapt	0	2.78143	0.805	0.045	0	SVZ/MZ
Ina	0	2.77522	0.78	0.095	0	SVZ/MZ
Rtn1	0	2.4767	0.997	0.695	0	SVZ/MZ
Sst	1.37638e-292	2.36107	0.12	0.005	3.23876e-288	SVZ/MZ
Epha5	0	2.30238	0.728	0.392	0	SVZ/MZ
Tubb2a	0	2.2624	0.759	0.224	0	SVZ/MZ
Ebf1	7.47692e-277	2.12311	0.16	0.018	1.75939e-272	SVZ/MZ
Meg3	0	2.03225	0.923	0.719	0	SVZ/MZ
Aplp1	0	1.99089	0.864	0.269	0	SVZ/MZ
Stmn2	0	1.97295	0.862	0.374	0	SVZ/MZ
Runx1t1	0	1.96461	0.817	0.208	0	SVZ/MZ
Ndn	0	1.96127	0.74	0.336	0	SVZ/MZ
Tubb3	0	1.94527	0.99	0.783	0	SVZ/MZ
Hist3h2ba	0	1.88132	0.948	0.59	0	SVZ/MZ
Ly6h	0	1.86935	0.673	0.134	0	SVZ/MZ
Tubb2b	0	1.78584	0.999	0.98	0	SVZ/MZ
Cnih2	0	1.78171	0.743	0.206	0	SVZ/MZ
Myt1l	0	1.77753	0.71	0.083	0	SVZ/MZ
Stmn3	0	1.75504	0.964	0.697	0	SVZ/MZ
Ank3	0	1.74835	0.686	0.136	0	SVZ/MZ
Mllt11	0	1.72393	0.97	0.578	0	SVZ/MZ
Thra	0	1.70962	0.905	0.559	0	SVZ/MZ
Pcsk1n	0	1.69757	0.55	0.111	0	SVZ/MZ
Tuba1a	0	1.61805	1	0.997	0	SVZ/MZ
Celf4	0	1.60241	0.916	0.455	0	SVZ/MZ
Syt1	0	1.60067	0.584	0.076	0	SVZ/MZ
Rab3a	0	1.58643	0.767	0.207	0	SVZ/MZ
Ncam1	0	1.5728	0.905	0.619	0	SVZ/MZ
Nsg2	0	1.57184	0.949	0.552	0	SVZ/MZ
Atp6v0c	0	1.53906	0.807	0.346	0	SVZ/MZ
Nxph1	0	1.53471	0.355	0.018	0	SVZ/MZ
Celf5	0	1.5335	0.718	0.138	0	SVZ/MZ
Igfbpl1	0	1.50262	0.918	0.468	0	SVZ/MZ
Nrxn2	0	1.47758	0.82	0.363	0	SVZ/MZ
Tmsb10	0	1.47392	0.997	0.994	0	SVZ/MZ
Actl6b	0	1.46759	0.626	0.062	0	SVZ/MZ
Nsg1	0	1.46742	0.955	0.702	0	SVZ/MZ
Crmp1	0	1.45756	0.932	0.613	0	SVZ/MZ
Tshz2	2.12142e-224	1.42783	0.303	0.1	4.99192e-220	SVZ/MZ
Nnat	0	1.41192	0.999	0.981	0	SVZ/MZ
Nrxn3	0	1.4067	0.932	0.526	0	SVZ/MZ
Ankrd12	0	1.39699	0.769	0.308	0	SVZ/MZ
Islr2	0	1.37828	0.458	0.167	0	SVZ/MZ
Malat1	0	1.37505	0.999	1	0	SVZ/MZ
Gria2	0	1.36141	0.648	0.324	0	SVZ/MZ
Actg1	0	1.35505	0.999	0.989	0	SVZ/MZ
Dcx	0	1.35301	1	0.518	0	SVZ/MZ
Gm14204	0	1.34268	0.693	0.192	0	SVZ/MZ
Bcl11b	0	1.32811	0.904	0.663	0	SVZ/MZ
Chd3	0	1.30378	0.944	0.721	0	SVZ/MZ
Hn1	0	1.30258	0.866	0.459	0	SVZ/MZ
Dpysl3	0	1.30256	0.96	0.682	0	SVZ/MZ
Gpc2	0	1.29933	0.663	0.185	0	SVZ/MZ
Pnmal2	0	1.29403	0.526	0.105	0	SVZ/MZ
Tmem108	0	1.29221	0.574	0.166	0	SVZ/MZ
Csrnp3	0	1.28939	0.608	0.12	0	SVZ/MZ
Kif5c	0	1.25297	0.862	0.645	0	SVZ/MZ
Rbfox2	0	1.24619	0.9	0.569	0	SVZ/MZ
Basp1	0	1.23808	0.996	0.988	0	SVZ/MZ
Bcl11a	0	1.23455	0.883	0.694	0	SVZ/MZ
Podxl2	0	1.23312	0.905	0.603	0	SVZ/MZ
Gap43	7.40775e-247	1.2251	0.508	0.264	1.74312e-242	SVZ/MZ
Hist3h2a	0	1.22405	0.655	0.225	0	SVZ/MZ
Calb1	0	1.22126	0.215	0.021	0	SVZ/MZ
Npy	4.02654e-151	1.2083	0.232	0.074	9.47486e-147	SVZ/MZ
Negr1	0	1.20322	0.371	0.078	0	SVZ/MZ
Cdk5r1	0	1.20253	0.897	0.57	0	SVZ/MZ
Maf	0	1.2024	0.312	0.043	0	SVZ/MZ
Ptms	0	1.19544	0.985	0.924	0	SVZ/MZ
Lppr3	0	1.18087	0.669	0.225	0	SVZ/MZ
Cmip	0	1.17836	0.831	0.478	0	SVZ/MZ
Slain1	0	1.17757	0.645	0.292	0	SVZ/MZ
Sh3bp5	0	1.17253	0.492	0.064	0	SVZ/MZ
Robo2	0	1.16772	0.431	0.141	0	SVZ/MZ
Dbn1	0	1.16449	0.94	0.794	0	SVZ/MZ
Sepw1	0	1.15832	0.845	0.455	0	SVZ/MZ
Gng2	0	1.15365	0.904	0.608	0	SVZ/MZ
Atat1	0	1.15263	0.877	0.569	0	SVZ/MZ
Celf3	0	1.1455	0.777	0.34	0	SVZ/MZ
Elmo1	0	1.14009	0.575	0.163	0	SVZ/MZ
Tagln3	0	1.13633	0.869	0.499	0	SVZ/MZ
Snhg11	0	1.1188	0.223	0.034	0	SVZ/MZ
Gad2	0	1.11785	0.842	0.461	0	SVZ/MZ
Socs2	0	1.0997	0.409	0.104	0	SVZ/MZ
Maged1	0	1.09956	0.906	0.77	0	SVZ/MZ
Klf7	0	1.09267	0.761	0.41	0	SVZ/MZ
Erbb4	0	1.08764	0.354	0.032	0	SVZ/MZ
Zcchc18	0	1.08505	0.614	0.24	0	SVZ/MZ
Gpm6a	0	1.08333	0.694	0.349	0	SVZ/MZ
St8sia2	0	1.08089	0.704	0.316	0	SVZ/MZ
Ctxn1	0	1.07765	0.883	0.653	0	SVZ/MZ
Nr2f2	1.56488e-76	1.06331	0.466	0.334	3.68232e-72	SVZ/MZ
A330076H08Rik	0	1.05868	0.418	0.083	0	SVZ/MZ
Arl8a	0	1.05048	0.722	0.382	0	SVZ/MZ
Scn3a	0	1.04431	0.42	0.043	0	SVZ/MZ
Soga3	0	1.04342	0.862	0.538	0	SVZ/MZ
Clmp	0	1.04196	0.383	0.042	0	SVZ/MZ
Fam57b	0	1.04001	0.528	0.149	0	SVZ/MZ
Atp6v0b	0	1.03411	0.863	0.626	0	SVZ/MZ
Kidins220	0	1.03399	0.583	0.221	0	SVZ/MZ
Stmn4	3.08785e-264	1.02815	0.561	0.311	7.26601e-260	SVZ/MZ
Kif21b	0	1.028	0.608	0.213	0	SVZ/MZ
Mef2c	0	1.02468	0.289	0.05	0	SVZ/MZ
Arx	7.8076e-201	1.02368	0.752	0.598	1.83721e-196	SVZ/MZ
Sptbn1	0	1.02354	0.679	0.381	0	SVZ/MZ
Dlgap4	0	1.0204	0.864	0.586	0	SVZ/MZ
Stmn1	0	1.02018	0.998	0.996	0	SVZ/MZ
Ngfrap1	0	1.01595	0.796	0.414	0	SVZ/MZ
Slc32a1	0	1.01553	0.66	0.26	0	SVZ/MZ
Fam115a	0	1.01437	0.684	0.298	0	SVZ/MZ
Selk	0	1.01316	0.749	0.361	0	SVZ/MZ
Ttc3	0	1.01287	0.994	0.977	0	SVZ/MZ
Zfp57	0	1.01279	0.624	0.263	0	SVZ/MZ
Dner	0	1.00663	0.482	0.141	0	SVZ/MZ
Mkrn1	0	1.00638	0.774	0.465	0	SVZ/MZ
Gdi1	0	1.00381	0.79	0.492	0	SVZ/MZ
Npdc1	0	1.0027	0.715	0.381	0	SVZ/MZ
Cirbp	0	1.00164	0.877	0.706	0	SVZ/MZ
Snrpn	0	0.994273	0.808	0.542	0	SVZ/MZ
Kif5a	0	0.987751	0.52	0.147	0	SVZ/MZ
Atp9a	0	0.979578	0.506	0.14	0	SVZ/MZ
Sobp	0	0.976462	0.527	0.195	0	SVZ/MZ
Mafb	1.58282e-301	0.975904	0.361	0.11	3.72452e-297	SVZ/MZ
Apc2	0	0.973406	0.684	0.303	0	SVZ/MZ
Gng3	3.28378e-275	0.968395	0.64	0.391	7.72707e-271	SVZ/MZ
Ptprd	1.22022e-218	0.963892	0.341	0.127	2.87131e-214	SVZ/MZ
Map2	0	0.963701	0.909	0.724	0	SVZ/MZ
Evl	0	0.960552	0.923	0.783	0	SVZ/MZ
Rmst	0	0.957219	0.219	0.018	0	SVZ/MZ
Map1b	0	0.954911	0.997	0.99	0	SVZ/MZ
Gad1	0	0.952617	0.547	0.181	0	SVZ/MZ
6330403K07Rik	0	0.9492	0.898	0.702	0	SVZ/MZ
Plk2	0	0.948208	0.308	0.017	0	SVZ/MZ
Fam171a2	0	0.947681	0.719	0.438	0	SVZ/MZ
Irf2bpl	0	0.941225	0.765	0.475	0	SVZ/MZ
Stx7	0	0.939428	0.641	0.315	0	SVZ/MZ
Actb	0	0.935827	0.999	0.999	0	SVZ/MZ
C1qtnf4	0	0.934511	0.327	0.041	0	SVZ/MZ
Rufy3	0	0.934296	0.849	0.585	0	SVZ/MZ
Bach2	0	0.931592	0.445	0.161	0	SVZ/MZ
Scg5	0	0.931145	0.651	0.335	0	SVZ/MZ
Fez1	0	0.930041	0.91	0.784	0	SVZ/MZ
Nrp2	0	0.927211	0.237	0.011	0	SVZ/MZ
Dusp8	0	0.923632	0.461	0.149	0	SVZ/MZ
Dclk1	0	0.923611	0.809	0.573	0	SVZ/MZ
Cd24a	0	0.923298	0.987	0.836	0	SVZ/MZ
Tubb5	0	0.922743	1	0.996	0	SVZ/MZ
Tmod2	0	0.921927	0.566	0.266	0	SVZ/MZ
Pafah1b3	0	0.921501	0.912	0.807	0	SVZ/MZ
Srgap1	0	0.920296	0.447	0.138	0	SVZ/MZ
A930011O12Rik	0	0.918118	0.578	0.199	0	SVZ/MZ
Lphn1	0	0.916989	0.525	0.192	0	SVZ/MZ
Akap9	0	0.913974	0.907	0.794	0	SVZ/MZ
Pou2f2	0	0.910379	0.425	0.143	0	SVZ/MZ
Smarca2	0	0.907374	0.537	0.242	0	SVZ/MZ
Cdk14	7.20328e-215	0.90284	0.577	0.36	1.695e-210	SVZ/MZ
Reep1	0	0.894458	0.414	0.098	0	SVZ/MZ
Rab3c	0	0.891944	0.417	0.099	0	SVZ/MZ
Rian	3.38192e-289	0.891433	0.521	0.212	7.958e-285	SVZ/MZ
Uchl1	6.9878e-268	0.891112	0.841	0.723	1.6443e-263	SVZ/MZ
Auts2	0	0.890647	0.955	0.899	0	SVZ/MZ
Fam65b	0	0.889455	0.355	0.039	0	SVZ/MZ
Bzw2	5.86572e-302	0.884815	0.826	0.709	1.38026e-297	SVZ/MZ
L1cam	0	0.884547	0.323	0.029	0	SVZ/MZ
Dpf1	8.54889e-300	0.883315	0.607	0.331	2.01164e-295	SVZ/MZ
Cacng2	0	0.881183	0.323	0.023	0	SVZ/MZ
Tspan13	3.01151e-285	0.880769	0.749	0.549	7.08639e-281	SVZ/MZ
Elavl3	0	0.880372	0.985	0.859	0	SVZ/MZ
Syt4	2.4293e-221	0.879165	0.212	0.047	5.71639e-217	SVZ/MZ
Tpgs2	1.21687e-267	0.878519	0.709	0.492	2.86341e-263	SVZ/MZ
Cxx1a	0	0.875991	0.447	0.109	0	SVZ/MZ
Tmem35	0	0.874822	0.423	0.102	0	SVZ/MZ
Gm1673	0	0.874373	0.948	0.876	0	SVZ/MZ
Chd5	0	0.869013	0.306	0.023	0	SVZ/MZ
Gm17750	1.48704e-100	0.864566	0.529	0.411	3.49915e-96	SVZ/MZ
Dlgap1	3.11038e-267	0.863867	0.231	0.046	7.31903e-263	SVZ/MZ
Khdrbs2	0	0.863498	0.34	0.074	0	SVZ/MZ
Kif3a	0	0.859955	0.659	0.393	0	SVZ/MZ
Olfm1	7.68012e-250	0.859558	0.454	0.204	1.80721e-245	SVZ/MZ
Thsd7a	0	0.857853	0.293	0.05	0	SVZ/MZ
Nav1	9.65098e-300	0.857192	0.719	0.424	2.27097e-295	SVZ/MZ
Isl1	3.87428e-15	0.857081	0.188	0.145	9.11657e-11	SVZ/MZ
Kdm5b	0	0.854319	0.783	0.527	0	SVZ/MZ
Tnrc6c	0	0.854308	0.871	0.714	0	SVZ/MZ
Efnb3	0	0.852861	0.435	0.149	0	SVZ/MZ
Gstm7	2.97011e-289	0.84956	0.523	0.241	6.98898e-285	SVZ/MZ
Hdgfrp3	1.13141e-305	0.848661	0.69	0.348	2.66232e-301	SVZ/MZ
Ssbp2	9.74239e-253	0.844715	0.757	0.579	2.29248e-248	SVZ/MZ
Nbea	6.74971e-250	0.843805	0.548	0.289	1.58828e-245	SVZ/MZ
Tubb4a	0	0.839128	0.409	0.102	0	SVZ/MZ
Lmtk3	0	0.839061	0.404	0.087	0	SVZ/MZ
Map1lc3a	1.38582e-279	0.836942	0.677	0.449	3.26098e-275	SVZ/MZ
Nrep	1.88962e-296	0.833503	0.856	0.642	4.44647e-292	SVZ/MZ
Ap3b2	0	0.830639	0.489	0.176	0	SVZ/MZ
Serinc1	2.52831e-269	0.829642	0.734	0.542	5.94936e-265	SVZ/MZ
Rundc3a	0	0.828888	0.72	0.413	0	SVZ/MZ
Sorbs2	3.37856e-257	0.827792	0.418	0.164	7.9501e-253	SVZ/MZ
Fnbp1l	0	0.825733	0.884	0.773	0	SVZ/MZ
Vamp2	5.3292e-299	0.822577	0.583	0.298	1.25401e-294	SVZ/MZ
Lhx6	5.45004e-211	0.822064	0.41	0.16	1.28245e-206	SVZ/MZ
Pfn2	0	0.820668	0.963	0.892	0	SVZ/MZ
Hecw1	0	0.816692	0.326	0.031	0	SVZ/MZ
Kifap3	1.36562e-274	0.814849	0.623	0.371	3.21345e-270	SVZ/MZ
Xpr1	2.65925e-162	0.811056	0.449	0.257	6.25747e-158	SVZ/MZ
Abr	0	0.807813	0.452	0.162	0	SVZ/MZ
Sgip1	0	0.804343	0.41	0.095	0	SVZ/MZ
Inpp5f	9.75085e-251	0.804116	0.58	0.33	2.29447e-246	SVZ/MZ
Klc1	3.27391e-274	0.802659	0.712	0.504	7.70383e-270	SVZ/MZ
Large	6.68253e-304	0.799652	0.373	0.11	1.57247e-299	SVZ/MZ
Ccdc23	7.07257e-259	0.798976	0.594	0.294	1.66425e-254	SVZ/MZ
2900011O08Rik	0	0.797292	0.419	0.117	0	SVZ/MZ
Pgrmc1	1.21048e-222	0.796879	0.776	0.651	2.84838e-218	SVZ/MZ
Sept3	0	0.794451	0.883	0.731	0	SVZ/MZ
Zfp428	1.46661e-297	0.792243	0.831	0.692	3.45108e-293	SVZ/MZ
Taok3	0	0.787655	0.427	0.131	0	SVZ/MZ
Sv2a	0	0.783257	0.332	0.043	0	SVZ/MZ
Rnf187	0	0.783147	0.882	0.775	0	SVZ/MZ
Tanc2	0	0.781704	0.389	0.108	0	SVZ/MZ
Prmt2	5.89902e-275	0.781524	0.577	0.304	1.3881e-270	SVZ/MZ
2700060E02Rik	1.08254e-264	0.780524	0.778	0.414	2.54733e-260	SVZ/MZ
Cdc42ep3	0	0.778396	0.355	0.058	0	SVZ/MZ
RP23-145L9.6	3.34807e-227	0.775893	0.592	0.262	7.87834e-223	SVZ/MZ
Tmem57	1.41094e-268	0.773896	0.717	0.48	3.32007e-264	SVZ/MZ
Mapk10	1.54745e-291	0.773345	0.513	0.219	3.6413e-287	SVZ/MZ
Parp6	4.55319e-282	0.772714	0.556	0.263	1.07141e-277	SVZ/MZ
Celf2	0	0.771507	0.962	0.922	0	SVZ/MZ
Kcnq2	0	0.77018	0.373	0.075	0	SVZ/MZ
Scrt1	5.28886e-284	0.767822	0.546	0.24	1.24452e-279	SVZ/MZ
Clcn4-2	0	0.767319	0.435	0.139	0	SVZ/MZ
Sox11	0	0.766823	1	0.998	0	SVZ/MZ
Sh3bp1	1.55967e-283	0.76655	0.504	0.209	3.67007e-279	SVZ/MZ
Snap47	1.18619e-263	0.764306	0.478	0.22	2.79123e-259	SVZ/MZ
Apc	2.48477e-222	0.758601	0.722	0.545	5.84692e-218	SVZ/MZ
Rprm	7.78529e-06	0.758447	0.269	0.272	0.183196	SVZ/MZ
Pde4dip	1.89672e-206	0.758296	0.368	0.151	4.46316e-202	SVZ/MZ
Cacnb3	1.33771e-244	0.75745	0.522	0.262	3.14776e-240	SVZ/MZ
Zfp608	1.23078e-230	0.753943	0.47	0.216	2.89614e-226	SVZ/MZ
Nova2	4.50305e-250	0.752806	0.689	0.46	1.05961e-245	SVZ/MZ
Mycbp2	2.59302e-233	0.752523	0.753	0.59	6.10163e-229	SVZ/MZ
Pak7	0	0.751846	0.381	0.091	0	SVZ/MZ
0610010F05Rik	5.36609e-224	0.751063	0.551	0.311	1.2627e-219	SVZ/MZ
Tspyl4	4.01855e-275	0.749338	0.498	0.226	9.45604e-271	SVZ/MZ
Atp1a3	0	0.748931	0.304	0.026	0	SVZ/MZ
Scaper	1.03892e-249	0.740033	0.44	0.189	2.44467e-245	SVZ/MZ
Zfhx3	6.12733e-07	0.737777	0.351	0.364	0.0144182	SVZ/MZ
Cd200	0	0.733351	0.269	0.022	0	SVZ/MZ
Dact1	0	0.732779	0.313	0.067	0	SVZ/MZ
Srcin1	3.6131e-261	0.73036	0.44	0.178	8.50199e-257	SVZ/MZ
Afap1	6.95648e-274	0.727708	0.461	0.186	1.63693e-269	SVZ/MZ
Jph4	0	0.727691	0.265	0.017	0	SVZ/MZ
Lphn3	0	0.72406	0.274	0.035	0	SVZ/MZ
Gramd1a	7.42951e-236	0.724015	0.626	0.37	1.74824e-231	SVZ/MZ
Znrf1	1.43551e-233	0.723576	0.659	0.427	3.37791e-229	SVZ/MZ
Map1lc3b	7.93205e-291	0.721951	0.856	0.735	1.86649e-286	SVZ/MZ
Zc2hc1a	1.86819e-225	0.719688	0.465	0.225	4.39603e-221	SVZ/MZ
2610203C20Rik	3.13135e-204	0.719207	0.656	0.349	7.36837e-200	SVZ/MZ
Cacng4	4.72569e-185	0.719044	0.57	0.356	1.112e-180	SVZ/MZ
Stxbp1	0	0.715892	0.347	0.081	0	SVZ/MZ
Tonsl	2.53634e-252	0.715768	0.492	0.222	5.96826e-248	SVZ/MZ
Fam20c	0	0.714912	0.349	0.069	0	SVZ/MZ
Gpr85	0	0.713823	0.313	0.074	0	SVZ/MZ
Tceb2	3.83909e-234	0.712261	0.815	0.455	9.03377e-230	SVZ/MZ
Sptan1	4.90779e-181	0.711873	0.597	0.409	1.15485e-176	SVZ/MZ
Pcdh17	2.29289e-75	0.711351	0.256	0.135	5.39539e-71	SVZ/MZ
Gnaq	5.76686e-203	0.710941	0.7	0.527	1.357e-198	SVZ/MZ
4930402H24Rik	6.15525e-229	0.70739	0.63	0.371	1.44839e-224	SVZ/MZ
Rtn4	7.36032e-290	0.704309	0.922	0.852	1.73196e-285	SVZ/MZ
Gabbr1	2.94125e-209	0.703827	0.555	0.326	6.92106e-205	SVZ/MZ
Mllt4	5.74786e-217	0.703295	0.544	0.267	1.35253e-212	SVZ/MZ
D7Ertd715e	1.81444e-258	0.702613	0.438	0.164	4.26955e-254	SVZ/MZ
Sema6c	6.9887e-266	0.70202	0.443	0.174	1.64451e-261	SVZ/MZ
Nyap1	9.34753e-299	0.701479	0.407	0.136	2.19957e-294	SVZ/MZ
Vcan	3.84656e-15	0.700145	0.456	0.452	9.05134e-11	SVZ/MZ
Arpc5	2.95449e-252	0.700132	0.793	0.636	6.95221e-248	SVZ/MZ
2310036O22Rik	3.88264e-244	0.698444	0.751	0.402	9.13624e-240	SVZ/MZ
Dnm3	0	0.694784	0.249	0.018	0	SVZ/MZ
Kif1a	2.6958e-204	0.693555	0.528	0.299	6.34348e-200	SVZ/MZ
Mapre3	0	0.692605	0.354	0.079	0	SVZ/MZ
Blcap	9.71422e-185	0.689692	0.504	0.286	2.28585e-180	SVZ/MZ
Myl12b	1.79472e-229	0.688732	0.786	0.658	4.22317e-225	SVZ/MZ
Dlx5	7.03717e-196	0.687687	0.718	0.431	1.65592e-191	SVZ/MZ
Grina	5.64498e-255	0.682857	0.421	0.164	1.32832e-250	SVZ/MZ
Smarcc2	5.2205e-228	0.682027	0.813	0.663	1.22844e-223	SVZ/MZ
Rbfox1	2.05264e-290	0.681689	0.196	0.028	4.83006e-286	SVZ/MZ
Dpysl5	4.42804e-194	0.679906	0.642	0.438	1.04196e-189	SVZ/MZ
Cttnbp2	5.36937e-263	0.677803	0.304	0.084	1.26347e-258	SVZ/MZ
Elavl2	2.56289e-148	0.677619	0.78	0.689	6.03073e-144	SVZ/MZ
Prnp	0	0.677023	0.347	0.093	0	SVZ/MZ
Tmeff1	7.74084e-204	0.676902	0.735	0.567	1.8215e-199	SVZ/MZ
Apba2	3.76697e-162	0.675239	0.558	0.366	8.86407e-158	SVZ/MZ
Kmt2e	2.82788e-242	0.673515	0.872	0.767	6.65428e-238	SVZ/MZ
Gdpd1	4.87066e-208	0.672939	0.695	0.479	1.14612e-203	SVZ/MZ
Syt5	0	0.670399	0.236	0.014	0	SVZ/MZ
Zfp503	1.96969e-72	0.669763	0.185	0.08	4.63488e-68	SVZ/MZ
Mir124-2hg	2.56153e-135	0.668799	0.749	0.634	6.02755e-131	SVZ/MZ
Gm15800	2.81192e-283	0.666173	0.377	0.116	6.61673e-279	SVZ/MZ
Eid1	4.66637e-260	0.665819	0.916	0.863	1.09804e-255	SVZ/MZ
Dbndd1	8.62595e-282	0.665673	0.38	0.123	2.02977e-277	SVZ/MZ
mt-Rnr2	2.0037e-177	0.663885	0.871	0.47	4.7149e-173	SVZ/MZ
9330159F19Rik	1.85891e-189	0.659164	0.424	0.199	4.3742e-185	SVZ/MZ
Atcay	4.40142e-228	0.658024	0.439	0.187	1.0357e-223	SVZ/MZ
Mcf2l	1.83273e-264	0.657865	0.36	0.118	4.31259e-260	SVZ/MZ
Smim14	1.2761e-209	0.65751	0.515	0.278	3.0028e-205	SVZ/MZ
Rnf165	1.42617e-216	0.656921	0.845	0.716	3.35593e-212	SVZ/MZ
Sox6	1.90519e-69	0.653598	0.434	0.318	4.4831e-65	SVZ/MZ
Gria4	0	0.652765	0.248	0.042	0	SVZ/MZ
March9	5.3667e-203	0.651387	0.488	0.254	1.26284e-198	SVZ/MZ
Sbk1	3.2291e-190	0.650271	0.763	0.614	7.5984e-186	SVZ/MZ
Gria1	0	0.650246	0.174	0.004	0	SVZ/MZ
Cxadr	1.75696e-165	0.648712	0.523	0.322	4.13429e-161	SVZ/MZ
Fxyd6	7.78473e-126	0.648298	0.729	0.647	1.83182e-121	SVZ/MZ
Trp53i11	7.8304e-188	0.646562	0.632	0.399	1.84257e-183	SVZ/MZ
Srrm3	2.62185e-217	0.645919	0.386	0.151	6.16946e-213	SVZ/MZ
Cxx1b	1.80705e-304	0.64537	0.359	0.099	4.25217e-300	SVZ/MZ
Samd14	1.01836e-176	0.644332	0.663	0.487	2.39631e-172	SVZ/MZ
Cfl1	0	0.643008	0.99	0.987	0	SVZ/MZ
D430019H16Rik	2.69356e-196	0.642997	0.446	0.214	6.33821e-192	SVZ/MZ
Spats2l	3.9045e-151	0.641714	0.289	0.112	9.18768e-147	SVZ/MZ
Map9	1.16729e-248	0.641686	0.348	0.116	2.74675e-244	SVZ/MZ
Amer2	4.52892e-174	0.641431	0.561	0.352	1.0657e-169	SVZ/MZ
Foxp2	0.000843319	0.64076	0.179	0.172	1	SVZ/MZ
Macf1	1.42048e-185	0.639436	0.811	0.711	3.34253e-181	SVZ/MZ
Nav3	0	0.639377	0.289	0.055	0	SVZ/MZ
Serp2	2.8868e-197	0.639353	0.382	0.166	6.79293e-193	SVZ/MZ
Lrp1	8.97328e-182	0.639137	0.455	0.235	2.1115e-177	SVZ/MZ
Btf3l4	6.75195e-179	0.63831	0.704	0.507	1.5888e-174	SVZ/MZ
Ogt	3.28995e-189	0.637756	0.834	0.732	7.74157e-185	SVZ/MZ
Cnrip1	5.27096e-191	0.636975	0.366	0.153	1.24031e-186	SVZ/MZ
Tsc22d1	3.17843e-228	0.636782	0.889	0.802	7.47915e-224	SVZ/MZ
Tmx4	7.00312e-117	0.635377	0.515	0.366	1.6479e-112	SVZ/MZ
Zdhhc2	1.91027e-120	0.634509	0.342	0.178	4.49506e-116	SVZ/MZ
Nr2f1	1.05705e-82	0.634443	0.693	0.582	2.48735e-78	SVZ/MZ
Mtss1	1.1031e-203	0.634282	0.379	0.156	2.59571e-199	SVZ/MZ
Plgrkt	1.90629e-189	0.631611	0.539	0.321	4.4857e-185	SVZ/MZ
Ccl27a	2.83067e-226	0.631608	0.401	0.165	6.66084e-222	SVZ/MZ
Bend5	7.3488e-207	0.628525	0.403	0.174	1.72925e-202	SVZ/MZ
Atp13a2	2.31708e-183	0.626911	0.425	0.208	5.45231e-179	SVZ/MZ
Sez6l2	0	0.626557	0.247	0.014	0	SVZ/MZ
Slc25a4	0	0.625981	0.952	0.926	0	SVZ/MZ
Scamp1	1.00674e-298	0.625827	0.299	0.072	2.36896e-294	SVZ/MZ
Rbfox3	0	0.624999	0.222	0.013	0	SVZ/MZ
Lrrc7	0	0.624934	0.265	0.042	0	SVZ/MZ
Gprasp2	2.92681e-195	0.622016	0.348	0.14	6.88709e-191	SVZ/MZ
Trappc2l	2.08645e-174	0.619366	0.571	0.373	4.90963e-170	SVZ/MZ
Six3os1	1.06784e-13	0.619052	0.105	0.069	2.51273e-09	SVZ/MZ
Rgs2	1.07339e-123	0.618311	0.258	0.108	2.52579e-119	SVZ/MZ
Gm27032	5.11442e-126	0.617282	0.456	0.268	1.20347e-121	SVZ/MZ
Ubb	3.03807e-203	0.615038	0.956	0.93	7.14888e-199	SVZ/MZ
Arpc1a	1.60374e-207	0.613931	0.821	0.722	3.77377e-203	SVZ/MZ
Smarca4	4.7936e-233	0.613668	0.906	0.847	1.12798e-228	SVZ/MZ
Apbb1	2.23764e-165	0.61291	0.515	0.318	5.2654e-161	SVZ/MZ
Uba1	8.51603e-173	0.612782	0.709	0.564	2.00391e-168	SVZ/MZ
Ywhag	2.62055e-165	0.611708	0.754	0.632	6.16642e-161	SVZ/MZ
Pdzd4	1.19568e-178	0.610561	0.387	0.179	2.81355e-174	SVZ/MZ
Ccdc88a	1.24848e-198	0.609706	0.933	0.865	2.93779e-194	SVZ/MZ
Bex2	1.04564e-187	0.609687	0.863	0.803	2.46051e-183	SVZ/MZ
Rusc1	0	0.609289	0.316	0.074	0	SVZ/MZ
Syp	2.33474e-250	0.608693	0.323	0.098	5.49388e-246	SVZ/MZ
Rsrp1	1.44958e-202	0.608615	0.879	0.82	3.411e-198	SVZ/MZ
Vezt	1.27785e-137	0.60834	0.504	0.326	3.00692e-133	SVZ/MZ
Cbfa2t3	4.99726e-144	0.608136	0.459	0.247	1.1759e-139	SVZ/MZ
Svop	0	0.607689	0.311	0.065	0	SVZ/MZ
Gabrg2	0	0.606534	0.247	0.021	0	SVZ/MZ
Daam1	1.24595e-146	0.605751	0.473	0.281	2.93184e-142	SVZ/MZ
Lbh	1.42084e-174	0.605545	0.398	0.186	3.34337e-170	SVZ/MZ
Ncan	8.43387e-181	0.60532	0.762	0.588	1.98457e-176	SVZ/MZ
Cotl1	1.41687e-138	0.604387	0.338	0.165	3.33405e-134	SVZ/MZ
Ttll1	2.52412e-242	0.604337	0.355	0.122	5.93951e-238	SVZ/MZ
Slco5a1	8.65165e-202	0.603245	0.341	0.127	2.03582e-197	SVZ/MZ
BC031181	1.31355e-200	0.601406	0.787	0.654	3.09093e-196	SVZ/MZ
Dctn2	1.32536e-159	0.601054	0.695	0.562	3.11871e-155	SVZ/MZ
Zswim6	1.14119e-144	0.598479	0.412	0.198	2.68533e-140	SVZ/MZ
Gdap1l1	2.79106e-211	0.596899	0.417	0.18	6.56763e-207	SVZ/MZ
Ftl1	0	0.596724	1	0.999	0	SVZ/MZ
Rac3	1.18264e-175	0.596604	0.3	0.113	2.78287e-171	SVZ/MZ
Scg3	4.9959e-145	0.596577	0.594	0.411	1.17559e-140	SVZ/MZ
Serf1	1.0384e-166	0.594953	0.807	0.727	2.44346e-162	SVZ/MZ
Brinp2	4.14449e-192	0.593427	0.259	0.078	9.75239e-188	SVZ/MZ
Eif4a2	1.01199e-157	0.592724	0.722	0.612	2.38131e-153	SVZ/MZ
Asxl3	1.41304e-195	0.59271	0.321	0.116	3.32502e-191	SVZ/MZ
Prkar2b	1.07487e-143	0.592225	0.403	0.217	2.52927e-139	SVZ/MZ
Phactr1	1.41621e-153	0.590891	0.294	0.117	3.33248e-149	SVZ/MZ
Pak1	1.15372e-142	0.590606	0.487	0.299	2.71483e-138	SVZ/MZ
Dync1h1	1.21249e-139	0.588989	0.671	0.533	2.8531e-135	SVZ/MZ
Atp6v0d1	9.41948e-150	0.588807	0.578	0.406	2.2165e-145	SVZ/MZ
Srp54b	9.3012e-186	0.587803	0.471	0.223	2.18867e-181	SVZ/MZ
Tle4	2.06457e-25	0.587146	0.259	0.196	4.85813e-21	SVZ/MZ
Mllt3	1.47914e-103	0.586818	0.457	0.305	3.48057e-99	SVZ/MZ
Reep5	2.97874e-122	0.586498	0.465	0.3	7.00927e-118	SVZ/MZ
Kif3c	2.22421e-186	0.585595	0.393	0.176	5.2338e-182	SVZ/MZ
Arl6ip5	1.8066e-174	0.58357	0.413	0.203	4.25112e-170	SVZ/MZ
Zfml	9.15957e-161	0.581946	0.501	0.262	2.15534e-156	SVZ/MZ
Eef2	0	0.581419	0.99	0.986	0	SVZ/MZ
Grin2b	9.70793e-291	0.581311	0.186	0.024	2.28437e-286	SVZ/MZ
Gnb2	1.47711e-280	0.579864	0.949	0.932	3.47579e-276	SVZ/MZ
Gnao1	2.0039e-129	0.579064	0.583	0.409	4.71537e-125	SVZ/MZ
Kalrn	4.81424e-145	0.577368	0.428	0.237	1.13284e-140	SVZ/MZ
Dpysl2	1.45317e-266	0.576257	0.965	0.954	3.41944e-262	SVZ/MZ
Hcfc1r1	1.83744e-172	0.574539	0.366	0.164	4.32369e-168	SVZ/MZ
Cited2	3.84552e-74	0.573278	0.647	0.556	9.04888e-70	SVZ/MZ
Tmem176b	7.72449e-155	0.572881	0.347	0.155	1.81765e-150	SVZ/MZ
Dos	0	0.572597	0.236	0.027	0	SVZ/MZ
Arf5	6.54873e-235	0.571802	0.909	0.872	1.54098e-230	SVZ/MZ
2010107G23Rik	0	0.571437	0.245	0.027	0	SVZ/MZ
Robo1	5.29441e-106	0.571357	0.354	0.197	1.24583e-101	SVZ/MZ
Zcchc12	1.18188e-220	0.571338	0.227	0.054	2.78107e-216	SVZ/MZ
Ube2d1	4.27718e-153	0.57112	0.716	0.582	1.00646e-148	SVZ/MZ
Scn3b	0	0.570729	0.207	0.019	0	SVZ/MZ
Dctn3	1.43958e-174	0.570403	0.785	0.668	3.38748e-170	SVZ/MZ
Samd10	6.09743e-176	0.5702	0.349	0.146	1.43479e-171	SVZ/MZ
Traf4	2.53334e-148	0.56999	0.683	0.512	5.9612e-144	SVZ/MZ
Pgap1	1.57488e-122	0.567648	0.352	0.183	3.70585e-118	SVZ/MZ
Kdm6b	3.09404e-154	0.567628	0.756	0.591	7.28058e-150	SVZ/MZ
Ip6k2	5.09665e-139	0.566343	0.545	0.36	1.19929e-134	SVZ/MZ
Caly	0	0.565856	0.202	0.018	0	SVZ/MZ
Sptbn2	1.01114e-181	0.564354	0.343	0.139	2.37932e-177	SVZ/MZ
Cxcl14	6.27959e-229	0.563447	0.1	0.006	1.47765e-224	SVZ/MZ
Agap1	2.75698e-111	0.563171	0.515	0.362	6.48744e-107	SVZ/MZ
Apbb2	9.24766e-81	0.562663	0.295	0.167	2.17607e-76	SVZ/MZ
Slc22a17	1.47491e-121	0.561081	0.399	0.226	3.47062e-117	SVZ/MZ
Tmem44	7.94737e-145	0.560725	0.375	0.185	1.8701e-140	SVZ/MZ
Wdfy1	6.78322e-286	0.560356	0.274	0.061	1.59616e-281	SVZ/MZ
Ptov1	1.07152e-288	0.560007	0.971	0.96	2.52139e-284	SVZ/MZ
Tram1l1	1.35187e-168	0.55921	0.311	0.124	3.18109e-164	SVZ/MZ
Pja2	4.53785e-116	0.558022	0.567	0.423	1.0678e-111	SVZ/MZ
Gprasp1	6.5097e-100	0.557311	0.462	0.32	1.5318e-95	SVZ/MZ
Tax1bp3	1.31279e-142	0.556956	0.51	0.319	3.08913e-138	SVZ/MZ
Tbc1d16	7.76568e-129	0.556615	0.515	0.343	1.82734e-124	SVZ/MZ
H13	8.23569e-123	0.55622	0.492	0.32	1.93794e-118	SVZ/MZ
Nmnat2	0	0.555002	0.241	0.031	0	SVZ/MZ
Zfhx2	1.53863e-88	0.55459	0.496	0.365	3.62056e-84	SVZ/MZ
Wbp1	1.84025e-137	0.553515	0.717	0.568	4.33029e-133	SVZ/MZ
Gabarap	7.09251e-242	0.551349	0.947	0.928	1.66894e-237	SVZ/MZ
Gdap1	1.52837e-144	0.550606	0.438	0.236	3.5964e-140	SVZ/MZ
Rab6b	5.5173e-124	0.550242	0.422	0.244	1.29828e-119	SVZ/MZ
Cep170	7.18683e-118	0.549945	0.664	0.552	1.69113e-113	SVZ/MZ
Alg2	3.71241e-140	0.549257	0.371	0.19	8.73568e-136	SVZ/MZ
Prr7	6.36785e-157	0.54923	0.303	0.123	1.49842e-152	SVZ/MZ
Mvb12b	2.3199e-113	0.548967	0.461	0.294	5.45895e-109	SVZ/MZ
Fam134a	7.88123e-199	0.547522	0.349	0.13	1.85453e-194	SVZ/MZ
Nkain3	0	0.54677	0.185	0.014	0	SVZ/MZ
Cyth2	4.15778e-160	0.546268	0.773	0.627	9.78367e-156	SVZ/MZ
Rusc2	8.62941e-278	0.545426	0.282	0.066	2.03059e-273	SVZ/MZ
Rnf14	5.67956e-133	0.544401	0.52	0.345	1.33646e-128	SVZ/MZ
Zfp536	1.1244e-30	0.544383	0.331	0.271	2.64583e-26	SVZ/MZ
Arid4a	3.86034e-112	0.543992	0.574	0.429	9.08377e-108	SVZ/MZ
Zfhx4	1.58099e-27	0.543366	0.262	0.194	3.72022e-23	SVZ/MZ
Calm2	1.95045e-230	0.543098	0.969	0.942	4.5896e-226	SVZ/MZ
Prdx2	1.55172e-305	0.541275	0.987	0.973	3.65134e-301	SVZ/MZ
Ccdc28b	4.57625e-130	0.540822	0.456	0.278	1.07684e-125	SVZ/MZ
Tecr	2.57645e-133	0.540265	0.813	0.752	6.06264e-129	SVZ/MZ
4632427E13Rik	4.46666e-132	0.539358	0.561	0.321	1.05105e-127	SVZ/MZ
Idh1	1.77974e-114	0.538001	0.682	0.584	4.1879e-110	SVZ/MZ
Ctnna2	2.31614e-109	0.536607	0.478	0.323	5.45011e-105	SVZ/MZ
RP24-393F8.2	0	0.534415	0.193	0.019	0	SVZ/MZ
Stx12	2.94584e-132	0.534368	0.616	0.469	6.93185e-128	SVZ/MZ
Trim46	2.58961e-252	0.532877	0.277	0.07	6.0936e-248	SVZ/MZ
Hsdl1	1.84491e-147	0.532075	0.404	0.211	4.34126e-143	SVZ/MZ
Rab1	8.95346e-143	0.531954	0.502	0.273	2.10684e-138	SVZ/MZ
Nedd4l	6.87385e-115	0.530872	0.526	0.359	1.61749e-110	SVZ/MZ
Magee1	3.48081e-179	0.530599	0.331	0.133	8.19069e-175	SVZ/MZ
5330434G04Rik	2.25177e-94	0.530135	0.41	0.259	5.29865e-90	SVZ/MZ
Carkd	6.46708e-178	0.529964	0.365	0.149	1.52177e-173	SVZ/MZ
Atxn10	2.82271e-122	0.529523	0.747	0.669	6.64212e-118	SVZ/MZ
Ppp3ca	4.36896e-98	0.529249	0.618	0.501	1.02806e-93	SVZ/MZ
Ctnnd2	1.20381e-107	0.529044	0.411	0.247	2.83268e-103	SVZ/MZ
Ap1s2	8.0203e-74	0.52856	0.331	0.209	1.88726e-69	SVZ/MZ
Atp2b1	1.19247e-36	0.528502	0.493	0.451	2.806e-32	SVZ/MZ
Trappc3	2.62247e-121	0.527933	0.567	0.424	6.17093e-117	SVZ/MZ
Atpif1	3.35979e-272	0.525886	0.974	0.964	7.90592e-268	SVZ/MZ
Nudt8	4.81982e-252	0.525734	0.255	0.06	1.13415e-247	SVZ/MZ
Wbp5	3.77496e-151	0.524833	0.704	0.405	8.88287e-147	SVZ/MZ
Dclk2	1.51297e-81	0.524585	0.638	0.508	3.56017e-77	SVZ/MZ
Mtch1	1.82073e-190	0.522048	0.921	0.9	4.28436e-186	SVZ/MZ
Nicn1	5.23467e-128	0.521352	0.392	0.215	1.23177e-123	SVZ/MZ
Gm28438	2.29612e-188	0.520322	0.435	0.174	5.403e-184	SVZ/MZ
Gm8730	1.10023e-156	0.519857	0.541	0.278	2.58896e-152	SVZ/MZ
Snap25	1.42245e-151	0.518763	0.289	0.114	3.34718e-147	SVZ/MZ
Trib2	1.14162e-108	0.518675	0.384	0.22	2.68634e-104	SVZ/MZ
Tmem63b	4.78767e-103	0.515728	0.517	0.366	1.12659e-98	SVZ/MZ
Trim2	4.35624e-126	0.515277	0.763	0.646	1.02507e-121	SVZ/MZ
Cbr1	7.17917e-125	0.513739	0.469	0.296	1.68933e-120	SVZ/MZ
Palm	4.28894e-120	0.513517	0.596	0.452	1.00923e-115	SVZ/MZ
Phactr3	4.30274e-141	0.512381	0.331	0.15	1.01248e-136	SVZ/MZ
Abcc5	7.02953e-111	0.511987	0.39	0.225	1.65412e-106	SVZ/MZ
Shb	9.24071e-97	0.511211	0.443	0.277	2.17443e-92	SVZ/MZ
Mxd4	9.32321e-131	0.51113	0.419	0.224	2.19384e-126	SVZ/MZ
Rbm18	9.63856e-116	0.508349	0.592	0.447	2.26805e-111	SVZ/MZ
Itm2b	3.39702e-75	0.507015	0.57	0.484	7.99354e-71	SVZ/MZ
RP23-122M2.3	4.28217e-276	0.506986	0.198	0.03	1.00764e-271	SVZ/MZ
Sez6	7.08967e-88	0.505699	0.392	0.244	1.66827e-83	SVZ/MZ
Nrcam	2.9102e-48	0.505387	0.276	0.18	6.84799e-44	SVZ/MZ
Usp22	8.61129e-124	0.505066	0.74	0.645	2.02632e-119	SVZ/MZ
Atp6v1g1	1.19344e-185	0.504115	0.909	0.893	2.80827e-181	SVZ/MZ
R3hdm4	1.0809e-108	0.503126	0.645	0.536	2.54347e-104	SVZ/MZ
Tcf4	5.29483e-09	0.502917	0.722	0.903	0.000124593	SVZ/MZ
Tmem59	6.66642e-114	0.502694	0.662	0.543	1.56867e-109	SVZ/MZ
Kif1b	4.26479e-145	0.502157	0.866	0.808	1.00355e-140	SVZ/MZ
Fbll1	0	0.499959	0.232	0.029	0	SVZ/MZ
1110058L19Rik	1.07615e-137	0.497733	0.378	0.18	2.5323e-133	SVZ/MZ
Bhlhb9	1.17092e-99	0.497236	0.429	0.282	2.7553e-95	SVZ/MZ
Cuedc2	1.05252e-114	0.496996	0.712	0.621	2.47668e-110	SVZ/MZ
Cadm4	1.44989e-101	0.49686	0.556	0.416	3.41174e-97	SVZ/MZ
2810428I15Rik	2.32558e-129	0.496415	0.479	0.261	5.47231e-125	SVZ/MZ
Cacfd1	3.01389e-110	0.496219	0.568	0.42	7.09199e-106	SVZ/MZ
Dscaml1	8.63093e-299	0.496002	0.217	0.034	2.03094e-294	SVZ/MZ
Nacad	0	0.494793	0.238	0.04	0	SVZ/MZ
Chmp2a	5.62709e-103	0.494732	0.568	0.444	1.32411e-98	SVZ/MZ
Kcnc1	1.42049e-204	0.494409	0.256	0.072	3.34256e-200	SVZ/MZ
Cmas	2.2197e-86	0.49394	0.559	0.458	5.22317e-82	SVZ/MZ
Rab2a	1.65415e-149	0.493772	0.848	0.802	3.89239e-145	SVZ/MZ
Atp6v1d	1.10862e-100	0.493124	0.574	0.448	2.60868e-96	SVZ/MZ
Ttc28	2.83718e-60	0.49294	0.598	0.531	6.67617e-56	SVZ/MZ
Camk2n1	1.98707e-97	0.49227	0.237	0.104	4.67578e-93	SVZ/MZ
Ptprs	2.39497e-138	0.492001	0.887	0.819	5.63561e-134	SVZ/MZ
Rhob	7.66951e-108	0.490992	0.383	0.222	1.80471e-103	SVZ/MZ
Maged2	1.289e-85	0.489628	0.422	0.287	3.03314e-81	SVZ/MZ
Polb	4.83145e-98	0.489328	0.503	0.361	1.13689e-93	SVZ/MZ
Ttc19	1.30588e-96	0.489202	0.427	0.279	3.07287e-92	SVZ/MZ
Cadm3	6.24214e-272	0.488922	0.219	0.039	1.46884e-267	SVZ/MZ
Rbm5	5.41509e-125	0.487388	0.8	0.719	1.27422e-120	SVZ/MZ
Plxna4	2.32995e-129	0.487323	0.182	0.053	5.48262e-125	SVZ/MZ
Gsk3b	3.6713e-186	0.486838	0.964	0.945	8.63893e-182	SVZ/MZ
Frmd5	5.91534e-112	0.486578	0.322	0.165	1.39194e-107	SVZ/MZ
Nudt10	1.93602e-130	0.485312	0.316	0.146	4.55566e-126	SVZ/MZ
Cplx2	5.9402e-69	0.485302	0.329	0.204	1.39779e-64	SVZ/MZ
Tmem50a	9.06158e-104	0.484926	0.581	0.447	2.13228e-99	SVZ/MZ
Guk1	1.10797e-89	0.483823	0.51	0.387	2.60716e-85	SVZ/MZ
Tspyl1	1.98474e-107	0.483745	0.414	0.252	4.6703e-103	SVZ/MZ
Rab33a	3.47845e-202	0.483635	0.273	0.083	8.18515e-198	SVZ/MZ
Pde10a	1.73751e-200	0.482121	0.213	0.051	4.08854e-196	SVZ/MZ
Tub	2.76786e-89	0.482046	0.312	0.17	6.51305e-85	SVZ/MZ
Araf	6.48702e-94	0.481823	0.496	0.357	1.52646e-89	SVZ/MZ
Grip1	4.96469e-92	0.481812	0.313	0.17	1.16824e-87	SVZ/MZ
Meis3	4.44845e-97	0.481709	0.368	0.216	1.04677e-92	SVZ/MZ
Ralgps1	3.54258e-104	0.481696	0.358	0.201	8.33605e-100	SVZ/MZ
Ttc9b	2.38885e-115	0.481216	0.652	0.495	5.6212e-111	SVZ/MZ
Vldlr	1.23801e-121	0.480316	0.276	0.118	2.91317e-117	SVZ/MZ
Tle2	1.82118e-292	0.479932	0.192	0.026	4.28541e-288	SVZ/MZ
Snap91	1.70538e-293	0.479526	0.215	0.034	4.01293e-289	SVZ/MZ
Slc6a6	4.75734e-76	0.477395	0.417	0.289	1.11945e-71	SVZ/MZ
Fdft1	5.85973e-53	0.475269	0.473	0.396	1.37885e-48	SVZ/MZ
Bdh1	1.01762e-142	0.4747	0.301	0.127	2.39455e-138	SVZ/MZ
Fam69b	1.05616e-88	0.474657	0.408	0.264	2.48526e-84	SVZ/MZ
Apoa1bp	2.7602e-149	0.474435	0.332	0.14	6.49503e-145	SVZ/MZ
Btg1	7.13239e-99	0.47343	0.765	0.675	1.67832e-94	SVZ/MZ
Kctd13	4.74714e-108	0.472737	0.346	0.187	1.11705e-103	SVZ/MZ
Zwint	3.14348e-96	0.471093	0.711	0.638	7.39692e-92	SVZ/MZ
Atxn7l3b	7.96296e-228	0.47006	0.974	0.971	1.87376e-223	SVZ/MZ
Mex3b	2.91853e-92	0.468957	0.676	0.566	6.86759e-88	SVZ/MZ
2410006H16Rik	1.00364e-102	0.468864	0.373	0.199	2.36166e-98	SVZ/MZ
Mapk8ip2	7.22621e-100	0.46877	0.381	0.227	1.7004e-95	SVZ/MZ
Suv420h1	7.71586e-118	0.468521	0.357	0.176	1.81562e-113	SVZ/MZ
Lmo3	2.19718e-48	0.468445	0.36	0.26	5.17019e-44	SVZ/MZ
Nipsnap1	1.8929e-92	0.467882	0.449	0.303	4.45419e-88	SVZ/MZ
Sars	4.54462e-87	0.467214	0.626	0.534	1.06939e-82	SVZ/MZ
Rtfdc1	2.31946e-146	0.466835	0.319	0.132	5.45792e-142	SVZ/MZ
Cacnb4	7.14442e-221	0.465303	0.205	0.043	1.68115e-216	SVZ/MZ
Pja1	3.85236e-90	0.464567	0.585	0.469	9.06498e-86	SVZ/MZ
A730017C20Rik	1.33273e-220	0.464462	0.206	0.043	3.13605e-216	SVZ/MZ
Dtx1	5.13594e-264	0.463705	0.217	0.039	1.20854e-259	SVZ/MZ
Cadps	3.41667e-120	0.462638	0.281	0.125	8.03978e-116	SVZ/MZ
Wsb2	4.74111e-89	0.462103	0.501	0.365	1.11563e-84	SVZ/MZ
Rabac1	1.89839e-88	0.460927	0.445	0.308	4.46709e-84	SVZ/MZ
1500004A13Rik	9.00688e-111	0.460761	0.403	0.214	2.11941e-106	SVZ/MZ
Map6	1.26931e-125	0.460548	0.245	0.096	2.98682e-121	SVZ/MZ
Ypel3	8.68608e-92	0.460174	0.57	0.431	2.04392e-87	SVZ/MZ
Srrm4	1.05085e-79	0.459977	0.529	0.37	2.47276e-75	SVZ/MZ
Rab11fip2	2.7252e-72	0.459018	0.417	0.294	6.41267e-68	SVZ/MZ
Rbm4b	3.82909e-115	0.458085	0.809	0.739	9.01023e-111	SVZ/MZ
Ntan1	2.83977e-87	0.457921	0.612	0.513	6.68227e-83	SVZ/MZ
Stard3nl	2.68942e-81	0.457796	0.536	0.423	6.32848e-77	SVZ/MZ
Tcf25	3.17483e-89	0.457778	0.681	0.613	7.4707e-85	SVZ/MZ
2510003E04Rik	4.69882e-152	0.457518	0.272	0.099	1.10568e-147	SVZ/MZ
Pcdh9	1.18086e-35	0.457162	0.249	0.169	2.77868e-31	SVZ/MZ
RP24-363O16.2	7.82711e-306	0.456652	0.156	0.013	1.8418e-301	SVZ/MZ
H3f3a	0	0.455802	0.999	0.999	0	SVZ/MZ
D930015E06Rik	9.43174e-111	0.455741	0.528	0.308	2.21938e-106	SVZ/MZ
Lrrc16a	2.78691e-185	0.455125	0.178	0.038	6.55787e-181	SVZ/MZ
Gm13889	3.32311e-28	0.455043	0.476	0.413	7.81961e-24	SVZ/MZ
Eef1a2	0	0.454981	0.161	0.004	0	SVZ/MZ
AI480526	2.57195e-80	0.453892	0.441	0.3	6.05206e-76	SVZ/MZ
Chn1	9.79893e-85	0.453577	0.559	0.437	2.30579e-80	SVZ/MZ
Trappc4	4.10576e-113	0.452748	0.772	0.711	9.66126e-109	SVZ/MZ
Mgat4b	3.32537e-101	0.452712	0.387	0.228	7.82494e-97	SVZ/MZ
Unc79	4.00103e-179	0.452425	0.242	0.072	9.41483e-175	SVZ/MZ
[truncated: 734 more rows]
